# 1 Surface association induces 2 cytotoxic alkyl-quinolones in 3 *Pseudomonas aeruginosa*

4 Geoffrey D. Vrla<sup>1</sup>, Mark Esposito<sup>1</sup>, Chen Zhang<sup>2</sup>, Yibin Kang<sup>1</sup>, Mohammad R.  
5 Seyedsayamdost<sup>2</sup>, Zemer Gitai<sup>1\*</sup>

\*For correspondence:  
[zgitai@princeton.edu](mailto:zgitai@princeton.edu)

6 <sup>1</sup>Department of Molecular Biology, Princeton University, Princeton, NJ 08544;

7 <sup>2</sup>Department of Chemistry, Princeton University, Princeton, NJ 08544

---

8

9 **Abstract** Surface attachment, an early step in the colonization of multiple host environments,  
10 activates the virulence of the human pathogen *P. aeruginosa*. However, the signaling pathways and  
11 downstream toxins specifically induced by surface association to stimulate *P. aeruginosa* virulence  
12 are not fully understood. Here, we demonstrate that alkyl-quinolone (AQ) secondary metabolites  
13 are rapidly induced upon surface association and represent a major class of surface-dependent  
14 cytotoxins. AQ cytotoxicity is direct and independent of other AQ functions like quorum sensing or  
15 PQS-specific activities like iron sequestration. Furthermore, the regulation of AQ production can  
16 explain the surface-dependent virulence regulation of the quorum sensing receptor, LasR, and the  
17 pilin-associated candidate mechanosensor, PilY1. PilY1 regulates surface-induced AQ production by  
18 repressing the AlgR-AlgZ two-component system. AQs also contribute to the known cytotoxicity of  
19 secreted outer membrane vesicles. These findings collectively explain previously mysterious  
20 aspects of virulence regulation and provide new avenues for the development of anti-infectives.

---

## 22 Introduction

23 The opportunistic human pathogen *P. aeruginosa* infects a wide range of hosts such as mammals,  
24 plants, insects, and fungi (Rahme *et al.*, 1995), and is a major contributor to the morbidity of cystic  
25 fibrosis patients (Nixon *et al.*, 2001) and hospital-acquired infections (Richards *et al.*, 1999). *P.*  
26 *aeruginosa* uses a large set of secreted proteins and secondary metabolites to carry out the multiple  
27 requirements necessary for a successful infection, including host colonization, immune evasion,  
28 nutrient acquisition, and host cell killing (cytotoxicity) (Valentini *et al.*, 2018). Given the multiple  
29 activities involved in pathogenesis, we recently developed a quantitative imaging-based host cell  
30 killing assay to specifically study the factors acutely required for killing host cells during short  
31 timescales (Siryaporn *et al.*, 2014). This assay revealed that cytotoxicity is activated by attachment  
32 of *P. aeruginosa* to a solid surface (Siryaporn *et al.*, 2014). This surface-induced cytotoxicity does  
33 not require the Type-IV Pilus (TFP), TFP-associated signaling complexes (PilA-Chp-Vfr/cAMP), or Type  
34 III Secretion Systems (T3SS), but does require two regulatory proteins, LasR and PilY1 (Siryaporn  
35 *et al.*, 2014). Since well-characterized cytotoxins such as T3SS and Vfr targets are not necessary for  
36 surface-induced host-cell killing in this assay, we sought to address the outstanding questions of  
37 which specific toxins mediate host cell killing in response to surface attachment and how these  
38 toxins are regulated by LasR and PilY1.

39 LasR is an important component of the complex network of *P. aeruginosa* quorum sensing (Lee  
40 and Zhang, 2015). Quorum sensing (QS) is the process by which bacteria synthesize and secrete

41 autoinducer signaling molecules that accumulate and activate their receptors as a function of  
42 bacterial cell density. There are at least three QS systems that have been previously implicated in  
43 regulating *P. aeruginosa* virulence: the *las*, *rhl*, and *pqs* QS systems (Lee and Zhang, 2015). These  
44 systems form a complex and interconnected network with extensive regulatory cross-talk (Maura  
45 et al., 2016). For example, LasR transcriptionally upregulates the autoinducer synthase enzymes of  
46 the *rhl* and *pqs* systems (Xiao et al., 2006b; Farrow et al., 2008), which in turn activate numerous  
47 downstream factors (Farrow et al., 2008). As a result, identifying the specific contribution of LasR  
48 dependent QS to the phenomenon of surface-induced virulence has been challenging.

49 Besides LasR, the other factor known to be required for surface-induced virulence is PilY1 (Siryaporn  
50 et al., 2014), a minor pilin-associated protein with a putative mechanosensory domain (Bohn  
51 et al., 2009). PilY1 promotes several surface-dependent behaviors including virulence induction  
52 (Siryaporn et al., 2014), twitching motility (Bohn et al., 2009), and biofilm formation (Kuchma et al.,  
53 2015; Luo et al., 2015). Like QS, there are multiple signaling pathways that have been proposed  
54 to function downstream of PilY1 (Luo et al., 2015). However, disrupting the key effectors of the  
55 two best-characterized pathways downstream of PilY1, c-di-GMP or cAMP production, does not  
56 influence surface-induced virulence (Siryaporn et al., 2014).

57 Understanding the signaling pathways that LasR and PilY1 use to trigger surface-induced viru-  
58 lence has been particularly challenging because the relevant output of these pathways, such as  
59 the cytotoxin(s) that *P. aeruginosa* secretes to kill host cells when surface-associated, has remained  
60 unknown. *P. aeruginosa* possesses numerous candidate toxins that could mediate surface-induced  
61 virulence, including the type III secretion system (T3SS) and numerous other secreted proteins and  
62 secondary metabolites (Valentini et al., 2018). Many of these candidates were previously found not  
63 to be required for surface-induced virulence (Siryaporn et al., 2014), which could reflect functional  
64 redundancy or the existence of a previously-overlooked cytotoxin.

65 Here we identify the pathways that activate surface-induced virulence by first showing that a  
66 single family of cytotoxins, the alkyl-quinolones (AQs), are both necessary and sufficient to explain  
67 the surface-induced killing of *Dictyostelium discoideum* by *P. aeruginosa*. We demonstrate that surface  
68 association triggers increased AQ secretion, which requires both LasR and PilY1. We show that these  
69 findings are also relevant to mammalian host cells and demonstrate that AQs are a major cytotoxic  
70 component of secreted outer membrane vesicles. Together our data support the conclusion that  
71 surface-induced virulence results from induction of AQs, which act as toxins that directly kill host  
72 cells.

## 73 Results

### 74 Alkyl-quinolones are necessary and sufficient for surface-induced virulence of *P.* 75 *aeruginosa* towards *D. discoideum*

76 Surface attachment strongly stimulates the ability of *P. aeruginosa* PA14 to kill *D. discoideum* amoebae  
77 (Siryaporn et al., 2014). To identify the factors required for virulence of surface-associated *P.*  
78 *aeruginosa* we used our surface-induced virulence assay to screen a number of mutants in secreted  
79 effectors known to promote pathogenesis (Figure 1-S1). Specifically, we grew each mutant to the  
80 same density, allowed it to associate with a glass surface for 1 hour, added *D. discoideum* host  
81 cells, and monitored host cell death by fluorescence microscopy using the live-cell-impermeant dye,  
82 calcein-AM. Loss of many candidate *P. aeruginosa* cytotoxins did not reduce surface-induced killing  
83 of *D. discoideum*, including phenazines, rhamnolipids, and hydrogen cyanide (Figure S1). In contrast,  
84 *pqsA* was absolutely required for surface-induced virulence (Figure 1A). PqsA is an enzyme required  
85 for the biosynthesis of AQs such as PQS, HHQ, and HQNO (Coleman et al., 2008), suggesting that  
86 AQs play a key role in surface-induced virulence.

87 The alkyl-quinolone (AQ) family of small molecules in *P.aeruginosa* performs a diverse set  
88 of virulence-related functions including quorum-sensing signaling (Rampioni et al., 2016), iron  
89 acquisition (Diggle et al., 2007), immune suppression (Kim et al., 2010), and anti-bacterial activities

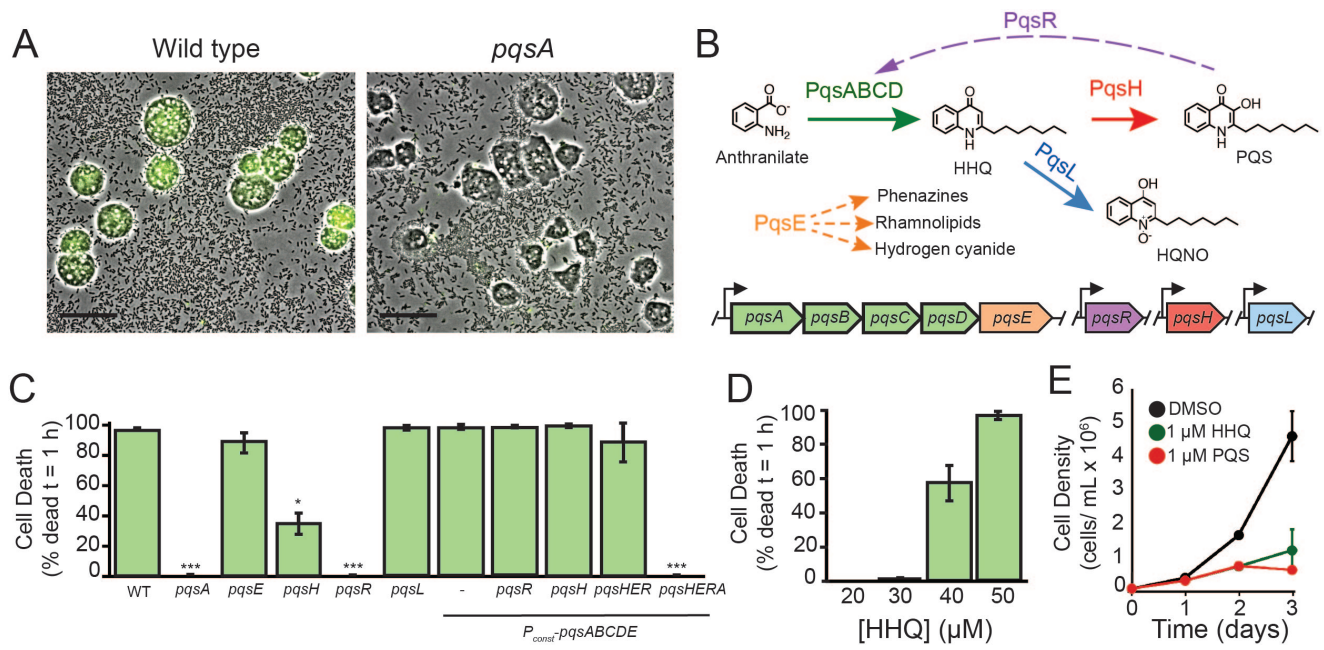

**Figure 1.** Alkyl-quinolone production is necessary and sufficient for surface-induced killing of *D. discoideum* by *P. aeruginosa*. (A) *D. discoideum* feeding on surface-attached wild type and  $\Delta pqsA$  *P. aeruginosa* after 1 h co-culture (scale bars = 30  $\mu$ m). Fluorescent calcein-AM staining indicates cell death. (B) Schematic of the PQS pathway depicting the functions of relevant genes. Solid and dotted arrows represent biosynthetic reactions and gene regulation, respectively. (C) Quantification of *D. discoideum* killing by PQS pathway mutants. Expression of *pqsABCDE* is driven by the endogenous *pqsA* promoter or a strong constitutive promoter inserted upstream of the *pqsA* gene ( $P_{const} - pqsABCDE$ ) (D) Cytotoxicity of purified HHQ to *D. discoideum* under conditions of the cell death assay in (C). (E) Axenic growth of *D. discoideum* in the presence of purified HHQ or PQS. Values are mean  $\pm$  SD (n = 5). Values in (C) and (D) are mean  $\pm$  SE (n = 3). For statistical analysis in (C), mutants were compared to wild type (Student's t-test, two-tailed, \* =  $p < 0.05$ , \*\*\* $p < 0.001$ ). Approximately 200-300 cells were analyzed for each measurement in (C) and (D).

**Figure 1-Figure supplement 1.** Virulence of various *P. aeruginosa* mutants towards *D. discoideum*.

**Figure 1-Figure supplement 2.** Virulence of *pqsA* and *pqsH* mutants supplemented with HHQ.

**Figure 1-Figure supplement 3.** Quantification of AQ production in  $P_{const} - pqsABCDE$  strains by LC/MS

90 (**Hazan et al., 2016**). One AQ species, PQS, has been suggested to possess cytotoxic activity towards  
 91 some mammalian cell types (**Abdalla et al., 2017**) and HQNO can disrupt electron transport in vitro  
 92 (**Reil et al., 1997**), but it has remained unclear if Aqs are important for surface-induced virulence  
 93 and if so, which AQ species and activities mediate this virulence. To determine the parts of the  
 94 AQ pathway responsible for surface-induced virulence of *P. aeruginosa* towards *D. discoideum*, we  
 95 assayed mutants deficient in the four key steps of the AQ pathway (Figure 1B): 1) converting  
 96 the anthranilate precursor to HHQ (mediated by PqsABCD), 2) converting HHQ into PQS and  
 97 HQNO (by PqsH and PqsL, respectively), 3) feedback regulation onto *pqsABCDE* expression (by PQS  
 98 and HHQ activating the transcriptional regulator PqsR, also known as MvfR), and 4) stimulating  
 99 RhlR-dependent QS (by PqsE). Neither the production of HQNO ( $\Delta pqsL$ ) nor the activation of RhlR-  
 100 dependent targets ( $\Delta pqsE$ ) was required for the killing of *D. discoideum* by *P. aeruginosa* (Figure 1C).  
 101 However, *pqsA*, *pqsH* and *pqsR* mutants showed reduced ability to kill *D. discoideum* (Figure 1C).

102 The reduced virulence of  $\Delta pqsH$  suggested that PQS contributes to surface-induced virulence,  
 103 which could be due to its role in iron acquisition, its QS ability to activate PqsR, or its activity as a  
 104 cytotoxin. To address the potential role of iron binding, we relied on the fact PQS binds iron while  
 105 its HHQ precursor does not (**Diggle et al., 2007**). Deleting *pqsH*, the enzyme that converts HHQ to  
 106 PQS, results in reduced levels of all Aqs due to the absence of PqsR-mediated feedback induction.  
 107 We thus transiently supplemented *pqsH* and *pqsA* mutants with HHQ for 1 hour at concentrations  
 108 sufficient to induce PqsR (50  $\mu$ M). We then washed away the HHQ before exposing these bacteria  
 109 to *D. dictyostelium*, such that during the virulence assay the *pqsA* mutants would have no HHQ or  
 110 PQS while *pqsH* mutants would have HHQ but no PQS. We found that transient HHQ addition was

111 sufficient to restore WT-levels of virulence to *pqsH* mutants but not to *pqsA* mutants (Figure 1-S2),  
112 indicating that HHQ is required for surface-induced virulence but PQS is not.

113 Having eliminated PQS-specific roles of AQs such as iron sequestration, we next tested if surface-  
114 induced virulence requires PqsR activation to achieve high levels of the AQs themselves or if  
115 additional PqsR targets (Maura et al., 2016) might be required. Consequently, we replaced the  
116 endogenous *pqsA* promoter with a strong constitutive promoter ( $P_{OXB20}$ ), which we refer to as ( $P_{const}$ ).  
117 This construct was sufficient to fully restore the virulence of *pqsR* and *pqsH* mutants to WT levels  
118 (Figure 1C). These results suggest that the requirement of PQS production for full virulence is due  
119 to the ability of PQS to promote high levels of *pqsABCDE* by activating the PqsR-dependent positive  
120 feedback loop. To further eliminate the possibility of PqsE-mediated QS, we simultaneously deleted  
121 *pqsE*, *pqsH*, and *pqsR* in the ( $P_{const} - pqsABCDE$ ) background and showed that these bacteria retained  
122 PqsA-dependent virulence (Figure 1C). To confirm that each of the strains analyzed retained the  
123 expected ability to produce HHQ and/or PQS, we used LC/MS to directly quantify these molecules  
124 in the bacterial supernatants and found the expected results in all cases (Figure 1-S3).

125 The ability of high expression of *pqsABCDE* to induce virulence in the absence of *pqsH* suggested  
126 that surface-induced virulence is mediated either by HHQ itself, or by another previously unchar-  
127 acterized product of *pqsABCDE*. To determine if HHQ is not just required, but also sufficient for  
128 killing *D. discoideum* we obtained commercially-purified HHQ (Sigma Aldrich, St. Louis, MO) and  
129 determined its lethal dose under the conditions used in the surface-induced virulence assay (Figure  
130 1D). Purified HHQ induced rapid cell death in *D. discoideum* at concentrations above 30  $\mu$ M (Figure  
131 1D), and inhibited growth of *D. discoideum* at concentrations as low as 1  $\mu$ M when added to axenic  
132 *D. discoideum* cultures (Figure 1E). While PQS was not necessary for virulence, PQS also acted as a  
133 direct cytotoxin as purified PQS killed *D. discoideum* (Figure 1E). Together, our results demonstrate  
134 that HHQ and PQS are cytotoxic towards *D. discoideum*, that AQ production is both necessary and  
135 sufficient for surface-induced virulence of *P. aeruginosa*, and that AQs other than PQS can mediate  
136 this toxicity.

### 137 **AQ regulation can explain the effects of known surface-induced virulence regula-** 138 **tors**

139 We previously showed that LasR and PilY1 are required for surface-induced virulence (Siryaporn  
140 et al., 2014). To understand whether the virulence defects of these mutants are due to loss of AQ  
141 production, we determined if they can be rescued by replacing the endogenous *pqsA* promoter with  
142 the  $P_{OXB20}$  strong constitutive promoter ( $P_{const}$ ). This *pqsABCDE* overexpression restored full virulence  
143 to surface-associated *lasR* and *pilY1* deletion mutants (Figures 2A and 2B). Furthermore, constitutive  
144 *pqsABCDE* expression was sufficient to induce detectable virulence in planktonic bacteria (Figures 2A  
145 and 2B). While the virulence achieved by expression of *pqsABCDE* in planktonic cells did not reach  
146 the same levels as the surface-attached bacteria, the conversion of avirulent cells to a virulence  
147 state with only the expression of a single operon is notable.

148 We next sought to determine if *pqsABCDE* expression is altered in *lasR* and *pilY1* mutants using a  
149 fluorescent reporter fusion to the *pqsABCDE* promoter. We fused a 500-bp fragment upstream of the  
150 *pqsA* gene to a promoterless *mCherry* gene, and integrated this construct at a neutral chromosomal  
151 locus. Wild type,  $\Delta lasR$ , and  $\Delta pilY1$  bacteria expressing this reporter were grown to mid-exponential  
152 phase ( $OD_{600nm} = 0.6$ ), and OD-matched cultures were allowed to attach to a surface for 1 hour. We  
153 measured the mean fluorescence intensity of individual surface-attached bacteria and normalized  
154 them to a constitutively expressed fluorescent reporter. The *pqsABCDE* promoter activity of both  
155  $\Delta lasR$  and  $\Delta pilY1$  was significantly lower than that of wild type (Figure 2C). To determine if the  
156 decreased promoter activity impacts PQS production, we measured PQS levels in ethyl acetate  
157 extracts of  $\Delta lasR$  and  $\Delta pilY1$  cultures using LC/MS. This revealed that PQS production is decreased  
158 in both  $\Delta lasR$  and  $\Delta pilY1$  compared to wild type (Figure 2D). Together these results suggest that  
159 the effects of known virulence regulators can be explained by their effects on *pqsABCDE* operon  
160 expression.

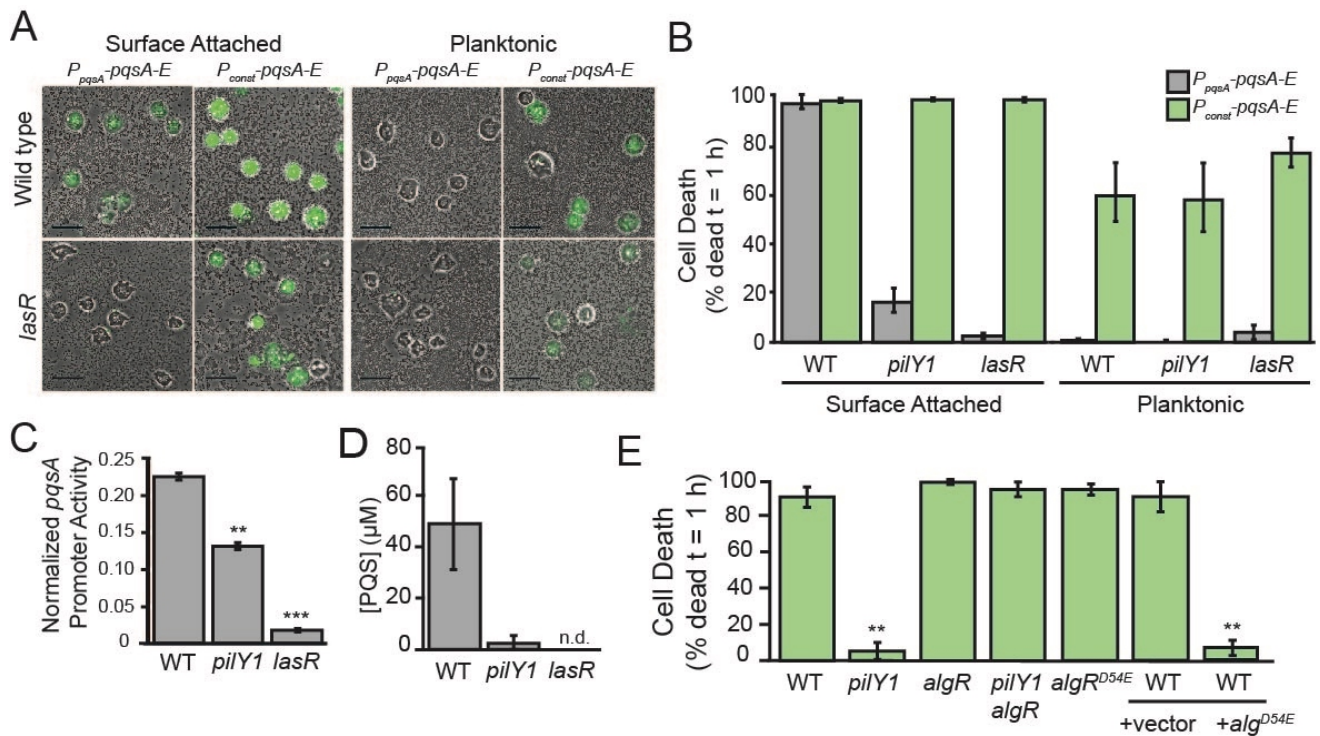

2.jpg

**Figure 2.** PiIY1 and LasR promote surface-induced virulence through *pqsABCDE* expression. (A) Representative images of *D. discoideum* feeding on surface-attached and planktonic *P. aeruginosa* expressing *pqsABCDE* genes under control of the endogenous *pqsA* promoter ( $P_{pqsA}$  - *pqsABCDE*) or a strong constitutive promoter ( $P_{const}$  - *pqsABCDE*) after 1 hour of co-culture (scales bars = 30  $\mu$ m). Fluorescent calcein-AM staining indicates cell death. (B) Quantification *D. discoideum* killing by surface-attached and planktonic wild type,  $\Delta pilY1$  and  $\Delta lasR$  *P. aeruginosa* after 1 h co-culture. (C) Mean fluorescence intensity per cell (>500 cells) of surface-attached *P. aeruginosa* expressing a ( $P_{pqsA}$  - *mCherry*) promoter fusion. Values are mean  $\pm$  SE (n = 3). (D) LC/MS-based quantification of PQS in extracts of wild type,  $\Delta pilY1$ , and  $\Delta lasR$  in stationary-phase liquid cultures. Values are mean  $\pm$  SE (n = 3), and concentrations were calculated using a standard curve constructed from purified PQS standards (n.d.= not detected). (E) Quantification *D. discoideum* killing by mutants in the AlgR-PiIY1 pathway after 1 h co-culture. Values in (B) and (E) are mean  $\pm$  SE (n = 3). Statistical analysis mutants in (C) were performed against wild type (Student's t-test, two-tailed, \* =  $p < 0.05$ , \*\*  $p < 0.01$ , \*\*\* $p < 0.001$ ). Approximately 150-300 cells were analyzed for each measurement in (B) and (E).

161 LasR has previously been shown to induce the PqsR *pqsABCDE* regulator (Xiao *et al.*, 2006b),  
162 but the connection between PilY1 and *pqsABCDE* expression has not been previously reported.  
163 Since the well-characterized c-di-GMP and cAMP pathways do not appear responsible for PilY1-  
164 mediated virulence induction (Siryaporn *et al.*, 2014), we compared the previously-reported surface-  
165 dependent transcriptional changes in WT and *pilY1* mutants (Siryaporn *et al.*, 2014). We found  
166 that both the AlgR-AlgZ TCS and its associated regulon are repressed in a PilY1-dependent manner  
167 (Siryaporn *et al.*, 2014; Belete *et al.*, 2008). To test if AlgR can regulate virulence we generated  
168 a phosphomimetic mutation in *algR* (*algRD54E*) and overexpressed it from a multi-copy plasmid.  
169 *algRD54E* overexpression strongly inhibited virulence (Figure 2E). To determine if AlgR functions  
170 downstream of PilY1 we turned to epistasis analysis and generated a *pilY1 algR* double mutant, which  
171 restored virulence to the avirulent *pilY1* single mutant (Figure 2E). Thus, *algR* is epistatic to *pilY1* and  
172 likely functions downstream of it. To determine if PilY1 acts on the levels or phosphorylation state  
173 of AlgR, we replaced the chromosomal copy of *algR* with a phosphomimetic *algRD54E* allele. Unlike  
174 in the case of overexpressing *algRD54E* from a plasmid, chromosomal expression of *algRD54E* did  
175 not affect virulence (Figure 2E), which suggests that PilY1 functions by transcriptionally repressing  
176 the levels of *algR*.

### 177 **Virulent surface-attached cells secrete more AQS than avirulent planktonic cells**

178 AQS have not been previously described to be surface-regulated, but our findings above suggested  
179 that surface attachment might stimulate AQ production. AQ quantification under the conditions  
180 of our surface-induced virulence assay is challenging using traditional MS-based techniques. Con-  
181 sequently, we developed a fluorescence-based AQ biosensor that can be used to measure PQS  
182 and HHQ levels under the exact conditions of the surface-induced *D. discoideum* cell death assay.  
183 Specifically, we engineered a reporter strain with three features: 1) it is unable to synthesize AQS  
184 itself (due to deletion of *pqsA*), 2) it linearly responds to PqsR activation without quorum-sensing  
185 feedback (due to replacement of the *pqsR* promoter with a constitutive  $P_{tac}$  promoter), and 3) it has  
186 a plasmid containing both a fluorescent YFP reporter for PqsR activation by AQS ( $P_{pqsA} - YFP$ ) and a  
187 constitutive mKate reporter ( $P_{rpoD-mKate}$ ) to normalize for plasmid copy number.

188 We validated our AQ biosensor by analyzing its response to purified AQ standards (Sigma-  
189 Aldrich, St. Louis, MO) in a 96-well format and by examining it in mutants with known effects on AQ  
190 production. The AQ biosensor responded linearly to PQS and HHQ across the range of AQ levels  
191 previously reported (Xiao *et al.*, 2006a) for *P. aeruginosa* cultures (Figure 3A). Consistent with the  
192 known binding affinities of PqsR (Xiao *et al.*, 2006a) the sensor responded more strongly to PQS  
193 than HHQ and did not respond to HQNO (Figure 3A and 3B). To use the biosensor to monitor AQ  
194 production by *P. aeruginosa* we doped the AQ reporter 1:100 into surface-attached wild type,  $\Delta pilY1$ ,  
195  $\Delta algR$ , and  $\Delta pilY1 \Delta algR$ . We note that the AQ biosensor is itself avirulent such that doping it at low  
196 levels (1:100) enabled us to quantify AQ production without disrupting the assay. Consistent with  
197 the epistasis results obtained with respect to virulence (Figure 2E), the AQ reporter showed reduced  
198 AQ levels upon deletion of *pilY1*, and this decrease was suppressed in a *pilY1 algR* double mutant  
199 (Figure 3-S1).

200 Having validated our AQ biosensor, we used it to compare AQ levels between planktonic and  
201 surface-attached *P. aeruginosa* populations. Because the AQ biosensor responds to both HHQ and  
202 PQS, we focused on quantifying AQS from  $\Delta pqsH$ , which makes HHQ but not PQS. We note that  
203 this strain is less virulent than wild type but retains 40% of its virulence and its virulence is still  
204 specifically induced by surface-association (Figure 1C). We doped the AQ biosensor (1:100) into  
205 cultures of  $\Delta pqsH$  at the time of *D. discoideum* addition and observed a significant increase in  
206 biosensor signal as compared to planktonic  $\Delta pqsH$  populations (Figures 3C and 3D). Conversion  
207 of biosensor signal to HHQ concentration using an HHQ standard curve (Figure S5) indicated that  
208 surface-attached *pqsH* bacteria secrete at least 20-fold more HHQ than planktonic cells (Figure 3D).

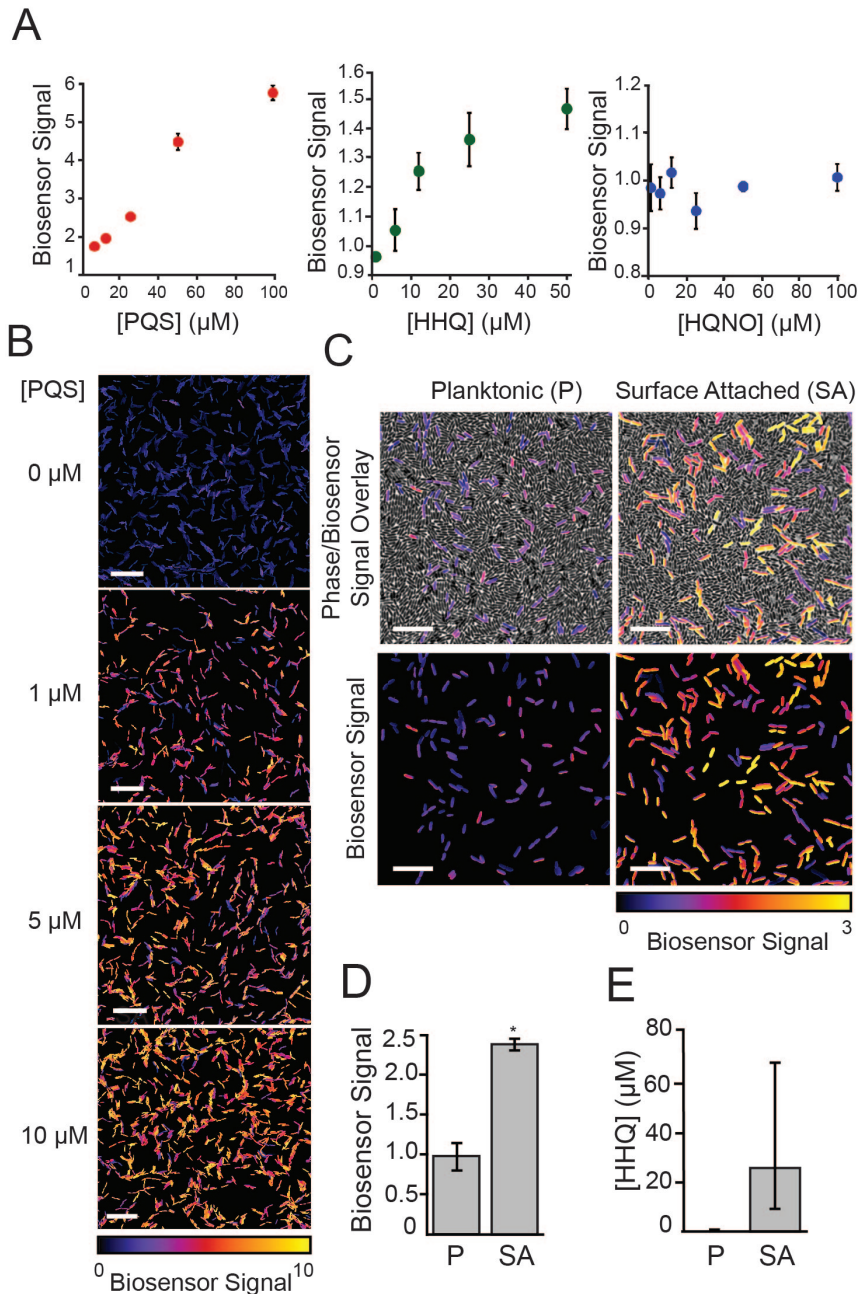

**Figure 3.** Biosensor-based detection of alkyl-quinolones in planktonic and surface-attached *P. aeruginosa* populations. (A) Response of AQ biosensor to increasing concentrations of purified PQS, HHQ, and HQNO in a 96-well microplate-based assay. Biosensor signal was calculated by normalizing YFP/mKate fluorescence by a DMSO control. Values are mean  $\pm$  SD ( $n = 6$ ). (B) Representative images of biosensor signal of single cells in response to addition of purified PQS added to 1% agar pads used for imaging (scale bars = 10  $\mu\text{m}$ ). (C) Representative images of biosensor doped 1:100 into planktonic or surface-attached  $\Delta pqsH$  *P. aeruginosa* grown under conditions of the *D. discoideum* cell death assay (scale bars = 5  $\mu\text{m}$ ). Top images show an overlay of phase images and biosensor signal and bottom images show only the biosensor signal. (D) Quantification of biosensor signal in (C). Biosensor signal is the mean YFP/mKate fluorescence per cell (>500 cells) subtracted by the value from biosensor doped into surface-attached *pqsA* mutant, as describe in the material and methods. (E) HHQ concentration calculated from biosensor signal in (D) using an HHQ standard (Figure 3-S1). Values in (D) and (E) are mean  $\pm$  SE ( $n = 4-6$ ). Statistical analysis in (D) is Student's t-test (two-tailed, \*\*  $p < 0.01$ ).

**Figure 3-Figure supplement 1.** Biosensor-based quantification of AQ production in *algR* mutants

**Figure 3-Figure supplement 2.** HHQ standard curve for biosensor-based AQ quantification of surface-attached *P. aeruginosa*

209 **AQ cytotoxicity promotes surface-induced virulence towards mammalian cells and**  
210 **is important for outer membrane vesicle toxicity**

211 To determine if our findings using *D. discoideum* host cells can be applied to mammalian hosts, we  
212 assayed the toxicity of purified HHQ, PQS, and HQNO towards adherent TIB-67 mouse monocytes  
213 and A549 human lung epithelial cells. Specifically, we added various concentrations of each purified  
214 AQ to the mammalian cells under standard culture conditions in a 96-well format and assessed  
215 viability after 48 hours using a water-soluble tetrazolium assay (Figure 4A). Both HHQ and PQS  
216 inhibited growth of TIB-67 in range of the concentrations observed in *P. aeruginosa* cultures by mass  
217 spectrometry, while HQNO did not (comparing Figure 4A to Figure 1-S3). PQS was significantly more  
218 toxic to TIB-67 than HHQ (Figure 4A). Both PQS and HHQ were also cytotoxic towards the A549 lung  
219 epithelial cell line, but this activity was lower than that against TIB-67 (Figure 4A).

220 We also developed an imaging-based virulence assay adapted from previous studies (*Siryaporn*  
221 *et al., 2014*) (Figure 4-S1) to determine if Aqs are necessary for surface-induced *P. aeruginosa*  
222 virulence towards mammalian cells. Comparing the wild type and  $\Delta pqsA$  *P. aeruginosa* revealed  
223 significantly more surface-induced monocyte killing by the wild type bacteria (Figure 4B). To more  
224 precisely distinguish the effect of AQ cytotoxicity from other activities mediated by PQS, we assayed  
225 the virulence of *pqsH pqsE pqsR P<sub>const</sub> - pqsABCDE* and an isogenic, *pqsA* null, derivative (Figures 4B  
226 and 4C). In the absence of PqsH, PqsE, and PqsR, any difference in virulence between these strains  
227 should be solely dependent on the ability of the bacteria products of PqsABCD such as HHQ. The  
228 strain producing HHQ caused significantly more killing than the *pqsA* mutant (Figures 4B), indicating  
229 that PQS-independent AQ activity increases the cytotoxicity of *P. aeruginosa* towards TIB-67 mouse  
230 monocytes. Thus, Aqs represent important cytotoxins that promotes the surface-induced ability of  
231 *P. aeruginosa* to kill both amoebae and monocytes and this activity does not require PQS. The fact  
232 that loss of AQ production completely eliminates surface-dependent virulence towards amoebae  
233 (Figure 1C) but not towards monocytes (Figure 4B) indicates that there are also additional factors  
234 that can partially compensate for the loss of Aqs in the context of monocyte infection.

235 An intriguing and poorly understood feature of *P. aeruginosa* virulence is the ability of these  
236 bacteria to secrete cytotoxic outer membrane vesicles (OMVs), packed with multiple virulence  
237 factors (*Bomberger et al., 2009*). PQS stimulates OMV production and is known to be abundant  
238 in OMVs (*Mashburn-Warren et al., 2009*). Given our identification of Aqs as potent cytotoxins, we  
239 hypothesized that they could play a role in mediating both OMV production and cytotoxicity. We  
240 therefore treated monocytes with equal amounts of OMVs purified from wild type or  $\Delta pqsA$  *P.*  
241 *aeruginosa*, and monitored monocyte death (Figure 4D). OMVs containing Aqs were significantly  
242 more cytotoxic than those that did not (Figure 4E), indicating that Aqs are a major contributor to  
243 the cytotoxicity of OMVs, not just their production.

244 **Discussion**

245 Multiple lines of evidence support our conclusion that host-cell killing in response to *P. aeruginosa*  
246 surface association is mediated by induction of AQ cytotoxins. Loss of PqsABCDE, which inhibits  
247 AQ production, leads to loss of surface-induced virulence towards *D. discoideum* and significantly  
248 reduces the surface-induced virulence towards monocytes. Thus, AQ production is important for  
249 surface-induced virulence towards multiple host types. Restoring PqsABCD in the absence of PqsE,  
250 PqsH, or PqsR rescues surface-induced virulence, indicating that a PQS-independent AQ, such as  
251 HHQ, is sufficient to induce virulence even in the absence of genes responsible for AQ-mediated QS  
252 or iron-dependent signaling. Finally, purified HHQ and PQS are sufficient to directly kill host cells  
253 in the absence of bacteria, indicating that these factors are themselves cytotoxins as opposed to  
254 regulators of additional factors. These studies reinforce recent suggestions that Aqs serve multiple  
255 important functions in virulence (*Lin et al., 2018*) and add surface-induced host cytotoxins to this  
256 growing list.

257 Our findings also implicate AQ production as a powerful reporter for dissecting the signal



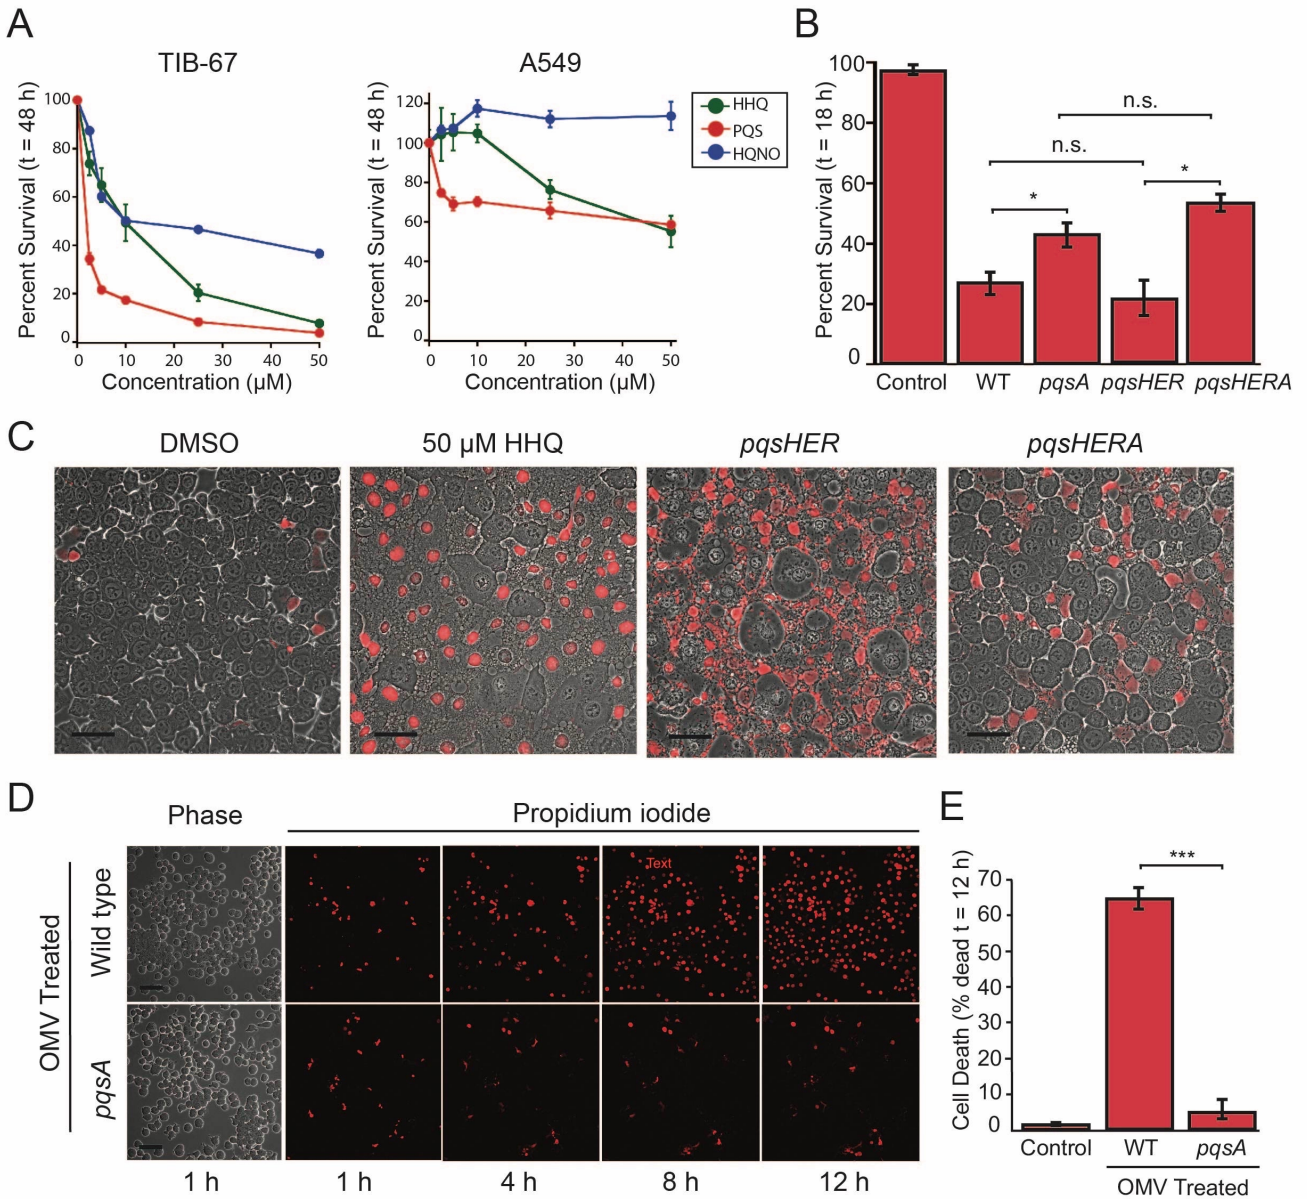

(1).jpg

**Figure 4.** Cytotoxicity of alkyl-quinolones to TIB-67 mouse monocytes and human A549 epithelial cells. (A) MTT cell viability assay of A549 human bronchial epithelial cells or TIB-67 mouse monocytes after 48 h of treatment with various concentrations of the alkyl-quinolones HHQ, PQS, or HQNO in a 96-well format. Percent survival is relative to an untreated control. Values are mean  $\pm$  SE (n = 3). (B) Percent survival of TIB-67 monocytes after 18 h co-cultured with surface-attached *P. aeruginosa*. Values are mean  $\pm$  SE (n = 5). (C) Representative images of TIB-67 monocytes co-cultured with surface-attached *P. aeruginosa* or treated with exogenous HHQ under conditions of the microscopy-based virulence assay. Propidium iodide (PI) staining of DNA of non-viable cells indicates cell death (scale bars = 50  $\mu\text{m}$ ). (D) Representative images of TIB-67 monocytes following treatment with outer membrane vesicles (OMV) purified from wild type or  $\Delta pqsA$  *P. aeruginosa* culture supernatants. (E) Quantification of OMV toxicity towards TIB-67 monocytes. Percent death is the increase in PI-stained nuclei divided by the total PI-negative cells at 1 h. Values are mean  $\pm$  SE. Approximately 2500-3000 cells were analyzed for each measurement in (B) and (E).

**Figure 4–Figure supplement 1.** Schematic of the monocyte cell death assay.

transduction pathways responsible for surface-induced virulence. Our analysis of the two known regulators of surface-induced virulence in the *Dictyostelium* cytotoxicity assay, PilY1 and LasR, showed that both regulators control virulence by activating *pqsABCDE* expression. Specifically, deletion of *pilY1* and *lasR* reduced *pqsA* promoter activity, PQS production, and surface-induced virulence. Meanwhile, constitutive expression of *pqsABCDE* was sufficient to restore the surface virulence of *pilY1* and *lasR* mutants and to increase the virulence of planktonic cells. Epistasis studies on both virulence and AQ production revealed that the repression of AlgR by PilY1 promotes high levels of *pqsABCDE* expression in surface-attached cells. A similar epistatic relationship between PilY1 and the AlgR-AlgZ system was recently implicated in the virulence of *P. aeruginosa* towards *C. elegans* hosts (Marko et al., 2018), suggesting that this pathway is also important in other virulence contexts. In the future it will be important to determine how AlgR/Z directly or indirectly regulate *pqsABCDE* expression. Additional outstanding questions include how LasR- and PilY1-dependent signaling is actually modulated by surface association and how these pathways intersect with other surface-dependent signaling pathways such as those mediated by TFP/cAMP or c-di-GMP (Bohn et al., 2009; Luo et al., 2015; Persat et al., 2015; Laventie et al., 2019).

More than 50 distinct Aqs have been identified in *P. aeruginosa* cultures (?). Historically, the bulk of the work on Aqs has focused on PQS and its roles in quorum sensing and the iron starvation response (Lin et al., 2018). More recently, a greater appreciation has emerged that Aqs can carry out diverse functions that range from signaling (Lee and Zhang, 2015; Rampioni et al., 2016), iron scavenging (Diggle et al., 2007), antibacterial tolerance (Hazan et al., 2016), OMV induction (Mashburn-Warren et al., 2009), immune suppression (Kim et al., 2010), and cytotoxicity towards host cells or other bacteria (Abdalla et al., 2017; Wu and Seyedsayamdost, 2017). Our work supports this expanded view of the functional repertoire of Aqs, representing evidence that AQ production is important for surface-induced virulence and demonstrating that HHQ can function as a cytotoxin that directly kills host cells independently of PQS.

The fact that Aqs are sufficient to explain surface-induced *D. discoideum* killing was surprising because *P. aeruginosa* is generally thought to kill hosts using a large and redundant set of cytotoxins (Valentini et al., 2018; Streeter and Katouli, 2016). The large number of toxins present in *P. aeruginosa* could be due to the preferential ability of different toxins to kill different host cell types. For example, A549 epithelial cells appeared less sensitive to AQ cytotoxicity in our assays, such that other cytotoxins like T3SS could take precedence in targeting these cells. While future studies will be needed to dissect the specific contributions of each virulence factor in different contexts such as with different hosts and in the presence of an intact immune system, our study highlights the value of quantitative assays that can define the specific capacities of different factors.

*D. discoideum* cells are highly phagocytic, suggesting that host delivery might be a limiting step given the poor solubility of Aqs. Our data suggest that HHQ and PQS are more active when delivered to hosts by bacteria, as the AQ biosensor indicated that lower levels of HHQ are required to kill *D. discoideum* when the HHQ is produced by bacteria than when supplemented exogenously. The increased cytotoxicity of Aqs when produced by bacteria could be related to OMVs. PQS is a strong stimulator of OMV production (Mashburn-Warren et al., 2009), and our work shows that Aqs are necessary for OMV toxicity. OMVs could thus represent a built-in cytotoxin delivery system that increases the ability of *P. aeruginosa* to use Aqs to both promote virulence and mediate intercellular signaling.

Given that multiple Aqs can act as cytotoxins, which AQ species is likely to mediate host cell killing in vivo? HHQ and other Aqs are present in the serum, urine, and sputum of CF patients with *P. aeruginosa* infections (Collier et al., 2002; Barr et al., 2015), and have been shown to correlate with clinical progression (Barr et al., 2015). The conversion of HHQ to downstream Aqs requires oxygen (Schertzer et al., 2010), and many infection sites are microaerophilic (Kamath et al., 2017; Hassett et al., 2009). Indeed, HHQ levels were found to be considerably higher than PQS or HQNO in a mouse burn infection model (Xiao et al., 2006a). Since bacterial biofilms on surfaces such as the CF lung are also oxygen-limited (Kamath et al., 2017; Hassett et al., 2009), HHQ may warrant particular

309 attention as a candidate AQ cytotoxin in these conditions. In addition to being oxygen-insensitive,  
310 HHQ is a poor agonist of PqsR, with 100-fold weaker activation than PQS (Xiao *et al.*, 2006a) (also  
311 see Figure 3A). Consequently, blocking the conversion of HHQ to PQS could represent a mechanism  
312 for *P. aeruginosa* to specifically induce a cytotoxic AQ without inducing competing PQS-dependent  
313 targets such as pyocyanin. Given that PQS is the most potent PqsR agonist among AQs (Xiao  
314 *et al.*, 2006a) and that a recent study found that HQNO is the most potent antibiotic (Thierbach  
315 *et al.*, 2017), we suggest that AQs could be functionally specialized with PQS serving primarily as  
316 a QS signaling molecule, HQNO primarily for inter-bacterial competition, and HHQ for host cell  
317 cytotoxicity under oxygen-limited conditions. Finally, we note that the different activities of AQs  
318 are not mutually exclusive such that induction of AQs upon surface association could represent a  
319 powerful strategy to simultaneously initiate cytotoxicity to ward off engulfment by phagocytic cells,  
320 suppress immune function (Kim *et al.*, 2010), and signal additional downstream factors to promote  
321 factors associated with later stages of infection (Rampioni *et al.*, 2016).

## 322 Methods and Materials

### 323 Bacterial Strains, Plasmids, and Growth Conditions

324 The strains and plasmids used in this study are described in Tables 1 and 2. Bacterial cultures were  
325 routinely grown in lysogeny broth (LB) broth at 37°C with aeration or on LB solidified with 1.5% agar  
326 (BD Biosciences, San Jose, CA). When stated, bacteria were grown in PS:DB media, which consists  
327 of development buffer (DB) (5 mM KH<sub>2</sub>PO<sub>4</sub>, 2 mM MgCl<sub>2</sub>, pH 6.5) and 10% (v/v) PS medium (10 g  
328 L<sup>-1</sup> Special Peptone (Oxoid, Hampshire, United Kingdom), 7 g L<sup>-1</sup> Yeast Extract (Oxoid, Hampshire,  
329 United Kindom), 10 mM KH<sub>2</sub>PO<sub>4</sub>, 0.45 M Na<sub>2</sub>HPO<sub>4</sub>, 15 g L<sup>-1</sup> glucose, 20 nM vitamin B12, 180 nM Folic  
330 Acid, pH 6.5). Antibiotics were added at the following concentrations when appropriate: carbenicillin  
331 300 µg mL<sup>-1</sup>, gentamycin 30 µg mL<sup>-1</sup>, and tetracycline 200 µg mL<sup>-1</sup> for *P. aeruginosa*; 100 µg mL<sup>-1</sup>,  
332 gentamycin 30 µg mL<sup>-1</sup>, and tetracycline 15 µg mL<sup>-1</sup> for *E. coli*. Expression of P<sub>tac</sub>- or P<sub>lac</sub>-controlled  
333 genes was induced with 1 mM IPTG. When indicated, cultures were supplemented with HHQ, PQS,  
334 or HQNO (Cayman Chemicals, Ann Arbor, MI). Unless otherwise stated, chemicals and reagents  
335 were purchased from Sigma Aldrich (St. Louis, MO).

### 336 Strain Construction

337 Primers used in this study are described in Table 3. All gene deletions described here are unmarked,  
338 in-frame deletions generated by two-step allelic exchange, as described previously (Hmelo *et al.*,  
339 2015). Briefly, upstream and downstream homology arms flanking the relevant gene were amplified  
340 with primer pairs (-KO1,-KO2 and -KO3,-KO4; Table 3), fused through overlap extension PCR (OE-  
341 PCR), and cloned into restriction sites of plasmid pEXG2. The pEXG2 plasmid was integrated  
342 into *P. aeruginosa* through conjugation using the donor strain *E. coli* S17. Exconjugants were  
343 selected on gentamycin and then the mutants of interest were counterselected on 5% sucrose.  
344 Transposon insertions obtained from the PA14 Transposon Mutant Database (Liberati *et al.*, 2006)  
345 were transferred between strains using the λ-Red recombination system (Lesic and Rahme, 2008).

346 To generate the *pqsABCDE* overexpression strain, the P<sub>OXB20</sub> promoter was amplified from the  
347 plasmid pSF-OXB20 (Oxford Genetics, Cambridge, MA) using primer pair (OXB20-5 and OXB20-3) and  
348 spliced between two 400 bp fragments that flank the *pqsA* promoter, which were amplified from  
349 gDNA using primers (pqsUP-5, pqsUp-3) and (pqsDOWN-5, pqsDOWN-3), respectively. The resulting  
350 construct was cloned into pEXG2 and integrated onto the chromosome using allelic exchange. To  
351 generate the inducible *pqsR* expression construct, the *pqsR* gene was amplified from gDNA with  
352 primer pair (pqsR-5, pqsR-3) and cloned into pUC18-mini-Tn7T-LAC. Proper gene orientation was  
353 confirmed by restriction mapping, and the resulting construct was integrated onto the chromosome  
354 by co-electroporation with pTNS2 using methods described previously (Choi and Schweizer, 2006).

355 To generate the *algRD54E* mutation and overexpression construct, the *algR* gene was amplified  
356 from gDNA using primers (algR-pUC-5, algR-pUC-3) and subcloned into pUC19 (New England

357 Biolabs, Ipswich, MA). Site-directed mutagenesis was performed by amplification of pUC19::*algR*  
358 with primers (*algR*-D54E-Fw, *algR*-D54E-Rv), and the mutant allele was either cloned into pEXG2  
359 and integrated into the *P. aeruginosa* chromosome by allelic exchange, or cloned into pBBRMC3 to  
360 obtain the overexpression construct. The  $P_{pqsA} - mCherry$  promoter fusion construct was generated  
361 by amplifying an approximately 500 bp fragment upstream of the *pqsA* gene with primer pair  
362 (P1pqsA-1, P1pqsA-2) and fusing it by OE-PCR to a promoterless *mcherry* gene, amplified from  
363 mini-CTX-2::PA1/04/03-mCherry with primer pair (P1pqsA-3, P1pqsA-4). The resulting fragment  
364 was cloned into the mini-CTX-2 plasmid and integrated into the chromosome at the CTX-2 phage  
365 attachment site (*attB*).

366 To generate the fluorescent AQ biosensor, a fragment containing the *pqsA* promoter and PqsR  
367 binding site (-19 bp to -219 bp) was amplified from gDNA using primer pair (*pqsA*-PaQa-5, *pqsA*-  
368 PaQa-3), and cloned into the BamHI/XhoI sites of pUCP18:: $P_{pqsA} - YFP P_{rpoD} - mKate$ . This plasmid  
369 was then transformed into a PAO1 strain containing a deletions in *pqsA*, and replacement of the  
370 *pqsR* promoter with a constitutive  $P_{tac}$  promoter. We note that while our virulence assays were all  
371 performed with the PA14 strain of *P. aeruginosa*, we used the PAO1 strain for the biosensor since  
372 the reporter is avirulent and does not interfere with PA14 virulence while PAO1 maintains plasmids  
373 at higher levels than PA14.

#### 374 ***D. discoideum* and mammalian cell culture**

375 *D. discoideum* AX3 was maintained axenically as described previously (*Siryaporn et al., 2014; Fey*  
376 *et al., 2007*). Briefly, frozen stocks were inoculated into overnight cultures of *E. coli* B/r, and plated  
377 on GYP plates. After incubation for 4-6 days at 22°C, individual spores were inoculated into PS  
378 media supplemented with Antibiotic-Antimycotic (AA) solution, and incubated at 22°C 100 rpm.  
379 When cultures reached approximately  $1 \times 10^6$  cells mL<sup>-1</sup>, cells were back-diluted 1:100 in fresh PS  
380 media. Axenic cultures were maintained for up to 1 month.

381 J774A.1 mouse monocytes (ATCC® TIB-67) and A549 (ATCC® CCL-18) (verified mycoplasma free)  
382 were grown at 37°C with 5% CO<sub>2</sub> in Dulbecco's Modified Eagle's Medium (Gibco, Dublin, Ireland)  
383 supplemented with 10 % fetal bovine serum and Penicillin-Streptomycin solution (Invitrogen, Grand  
384 Island, NY). Cells were passaged according to the ATCC protocols.

#### 385 ***D. discoideum* cell death assay**

386 Cell death assays were performed as described previously with minor modifications (*Siryaporn*  
387 *et al., 2014*). Overnight cultures of *P. aeruginosa* were diluted 1:100 in PS:DB media and grown to  
388 OD<sub>600nm</sub> = 0.6-0.8 at 37 °C with aeration. Cultures were transferred to glass-bottom dishes (Mattek,  
389 Ashland, MA) and incubated for an additional 1 hour at 100 rpm on a rotary shaker. For the  
390 planktonic condition, aliquots of culture media were washed with PS:DB, concentrated 20-fold,  
391 and plated onto fresh glass-bottom dishes. For the surface-attached condition, culture media was  
392 aspirated and surface-attached cells were washed with PS:DB. Aliquots of *D. discoideum* culture  
393 (between  $2.5 \times 10^5$  cells mL<sup>-1</sup>) were washed with PS:DB, and added to planktonic and surface-  
394 attached bacteria to achieve the appropriate multiplicity of infection (MOI), which ranged between  
395 roughly 500:1 to 1000:1 (*P. aeruginosa* to *D. discoideum*). See *Siryaporn et al. (2014)* for details  
396 regarding assay validation and MOI quantification. The combined samples were covered with a 1%  
397 agar pad, prepared by pouring molten 1% agar in PS:DB containing 1 μM calcein-AM (Invitrogen,  
398 Grand Island, NY) on a glass surface, and cutting the solidified pad into 1 cm x 1 cm sections.  
399 Samples were analyzed by imaging cells with phase contrast and FITC channels after 1 hour of  
400 incubation at 25 °C using fluorescence microscopy. Cell death was quantified by counting the total  
401 number of calcein-AM-positive and -negative cells. All reported values of percent cell death are  
402 averages of at least three independent experiments. Each set of experiments included wild type  
403 and *pqsA* mutant controls, and each measurement was of 150-500 cells.

404 For quantifying cytotoxicity of purified AQs under conditions of the microscopy-based cell death  
405 assay (Figure 1D), AQs were diluted 1:200 into molten 1% agar in PS:DB and pads were prepared as

406 described above. Samples of *D. discoideum* were transferred to glass-bottom dishes and covered with  
407 a 1 cm x 1 cm agar pad and incubated at 25°C for 1 hour. For quantifying cytotoxicity of purified  
408 Aqs in axenic *D. discoideum* cultures (Figure 1E), *D. discoideum* was subcultured to 10,000 cells mL<sup>-1</sup>  
409 in fresh PS media with antibiotics and varying concentrations of Aqs. Cultures were incubated at  
410 22°C with shaking at 450 rpm, and cell density was measured by counting with a hemocytometer.  
411 Experiments were performed with five biological replicates.

### 412 **Quantification of fluorescent reporter expression**

413 Reporter strains were grown according to the procedures of the *D. discoideum* cell death assay.  
414 Bacterial cultures were transferred to glass-bottom dishes when OD<sub>600nm</sub> reached 0.6, and incubated  
415 at 37°C with shaking (100 rpm) for 1 h. Cells were washed and isolated as described above,  
416 and single cells were imaged immediately after addition of the 1% agar pad using fluorescence  
417 microscopy. Mean fluorescence intensity per cell was computed for 500-1000 cells, depending on  
418 the experiment. When comparing *pqsA* promoter activity between planktonic and surface-attached  
419 bacteria, mean fluorescence intensity per cell was normalized by the expression of a constitutive  
420 *P<sub>tac</sub>-mCherry* reporter, which was measured in the same manner as the *P<sub>pqsA</sub>* reporters. All reported  
421 values are averages from at least three independent experiments.

### 422 **LC/MS-based quantification of AQ production**

423 Overnight cultures of *P. aeruginosa* were subcultured 1:100 into 20 mL PS:DB and grown for 18 h  
424 200 rpm. Cultures were extracted with equal volumes of ethyl acetate, dried and resuspended in  
425 methanol. Samples were analyzed by HPLC-MS on a 1260 Infinity Series HPLC system (Agilent, Santa  
426 Clara, CA) equipped with an automated liquid sampler, a diode array detector, and a 6120 Series  
427 ESI mass spectrometer using an analytical Luna C18 column (5 m, 4.6 x 100 mm, Phenomenex,  
428 Torrance, CA) operating at 0.6 mL min<sup>-1</sup> with a gradient of 25% MeCN in H<sub>2</sub>O to 100% MeCN over 18  
429 minutes. A standard curve constructed from commercial AQ standards was used to calculate AQ  
430 concentrations in cultures.

### 431 **Plate-based AQ biosensor assay**

432 Overnight cultures of the AQ biosensor was diluted 1:100 in LB with 1 mM IPTG and grown to late  
433 exponential phase (OD<sub>600nm</sub> = 1.0-2.0). Bacteria were resuspended in fresh LB to OD<sub>600nm</sub> = 1.0, and  
434 added to equal volumes of LB supplemented with various concentrations of Aqs (purchased from  
435 Sigma-Aldrich) in a 96-well plate. Plates were sealed with a breathable membrane (DivBio, Dedham,  
436 MA) and incubated at 37°C 450 rpm while monitoring fluorescence in the YFP (500 nm excitation/  
437 540 nm emission) and mKate (590 nm excitation/ 645 nm emission) channels. Biosensor signal  
438 was calculated by normalizing the YFP signal by the mKate signal and subtracting the baseline  
439 expression from a DMSO control.

### 440 **Biosensor-based AQ quantification of surface-attached bacteria**

441 Overnight cultures of *pqsH* mutant *P. aeruginosa* were grown following the procedures of the *D.*  
442 *discoideum* cell death assay. The AQ biosensor was prepared according to the procedures of the  
443 plate-based assay, but resuspended to OD<sub>600nm</sub> = 0.2 in PS:DB. For planktonic samples, biosensor was  
444 added to equal volumes of planktonic cell suspensions. For surface-attached samples, biosensor  
445 was added to washed, surface-attached cells. Cells were covered with a 1% agar pad in PS:DB  
446 (1 mM IPTG), and incubated at 25 °C for 1-2 hours. Single-cell YFP and mKate fluorescence was  
447 measured by microscopy, and biosensor signal was calculated by normalizing the YFP signal by  
448 the mKate signal, and subtracting by the baseline expression of biosensor doped into a lawn of  
449 surface-attached  $\Delta pqsA$  *P. aeruginosa*. For clarity, biosensor signal in representative microscopy  
450 images are normalized by the mean biosensor signal of biosensor doped into a lawn of surface-  
451 attached  $\Delta pqsA$ . All reporter biosensor signal measurements are averages from at least three  
452 independent experiments, and approximately 500 individual cells were analyzed for each condition.

453 An HHQ standard curve was generated and used to convert biosensor signal to HHQ concentration.  
454 Biosensor was added to surface attached  $\Delta pq s A$  *P. aeruginosa* and covered with 1% agar pads made  
455 with PS:DB, supplemented with various concentrations of HHQ. Biosensor signal in response to  
456 HHQ standards was calculated as described above. A new standard curve was constructed for each  
457 independent experiment.

#### 458 **Mammalian cytotoxicity assay of purified AQs**

459 TIB-67 monocytes or A549 epithelial cells were seeded at a density of 150,000 cells or 75,000 cells  
460  $\text{cm}^{-2}$  in a 96-well plate and incubated at 37°C 5%  $\text{CO}_2$  for 24 hours. Cells were treated with purified  
461 AQ compounds dissolved in DMSO such that the final concentration of DMSO was less than 0.5%.  
462 After 48 hours, media was aspirated and the WST-8 reagent EZQuant (Alstem Bio, Richmond, CA)  
463 was used to assess cell viability. Values reported are averages of three biological replicates. At  
464 least three independent experiments were performed, and the trends observed in Figure 4A was  
465 observed across all experiments.

#### 466 **Microscopy-based TIB-67 cell death assay**

467 For the microscopy-based assay, TIB-67 monocytes were seeded at a density of 75,000 cells  $\text{cm}^{-2}$   
468 and incubated at 37°C 5%  $\text{CO}_2$  for 24 hours. TIB-67 monolayers were washed twice with phosphate  
469 buffered saline (PBS) (Gibco, Dublin, Ireland) and combined with *P. aeruginosa* samples. To prepared  
470 *P. aeruginosa* samples, cultures were grown following the procedures of the *D. discoideum* cell  
471 death assay. When cultures reached  $\text{OD}_{600\text{nm}} = 0.5-0.6$ , cultures were transferred to petri dishes  
472 coated with a thin layer of 1% agar in PS:PBS (10% (v/v) PS media in PBS with 1 mM  $\text{MgSO}_4$  and  
473 0.1 mM  $\text{CaCl}_2$ , pH = 7.2) and grown for an additional 1 hour at 37°C on a rotary shaker (100  
474 rpm) to allow surface attachment. Surface-attached bacteria were washed twice with PS:PBS. The  
475 density of surface-attached bacteria could be adjusted based on force applied during washing steps  
476 using an automated pipette, and density was optimized to achieve a final multiplicity of infection  
477 (MOI) of 1:50 to 1:150 (*P. aeruginosa* to TIB-67). Propidium iodide (PI; 1  $\mu\text{M}$  final) and sub-MIC  
478 dose of tetracycline (5  $\mu\text{g mL}^{-1}$  final) was added to prepared monocyte samples. Agar pads were  
479 excised and inverted onto prepared monolayers of TIB-67 monocytes. Concentrations of PI and  
480 tetracycline were calculated based on the volume of the agar pad. Samples were incubated at 30°C  
481 in an incubated chamber, and cells were tracked over the course of 24 hours using fluorescence  
482 microscopy. Cell death was monitored by PI staining of the DNA of non-viable cells. Bacterial  
483 co-culture with monocytes resulted in substantial monocyte lysis (see Figures 4C) and subsequent  
484 diffusion of the nuclear PI stain. Therefore, *P. aeruginosa* virulence was most precisely quantified by  
485 counting viable monocytes (PI-negative) as opposed to dead monocytes (PI-positive). PI-negative  
486 cells were counted at various timepoints and divided by the number of PI-negative cells at 1 h in  
487 the same field of view. Treatment of monocytes with AQs or purified in OMVs did not result in lysis  
488 (see Figures 4C and 4D), and therefore virulence was measured by counting dead, PI-positive cells  
489 (Figure 4E).

#### 490 **OMV isolation and quantification**

491 Outer membrane vesicles (OMV) were isolated as described previously (*Bauman and Kuehn, 2006*).  
492 Because OMVs are not significantly produced in the absence of PQS, we used the approach of  
493 *Bauman and Kuehn (2006)* to stimulate OMV production in the *pqsA* mutant, and kept conditions  
494 the same for wild type cultures to minimize differences between samples. Briefly, overnight cultures  
495 of *P. aeruginosa* were subcultured 1:200 in LB and grown at 37°C 250 rpm to  $\text{OD}_{600\text{nm}} D = 0.3-0.4$ .  
496 Polymyxin B was added to a final concentration of 4  $\mu\text{g mL}^{-1}$ , and cultures were grown at 37°C 250  
497 rpm until they reached an  $\text{OD}_{600\text{nm}}$  between 0.8-1.0. Culture supernatants were filtered through a  
498 0.45  $\mu\text{m}$  filter (Millipore, Burlington, MA), then centrifuged at 40,000 x g for 1 hour. Pellets were  
499 resuspended in PBS, filtered through a 0.45  $\mu\text{m}$  filter, and centrifuged for an additional 1 hour at  
500 100,000 x g. Samples were resuspended in PBS and concentrated with a 10,000 MWCO centrifugal

501 filter device (Millipore, Burlington, MA). Filtrate was used as a vehicle control. OMV concentrations  
502 were measured by addition of the lipophilic dye FM-464 (Fisher Scientific, Hampton, NH) and  
503 measuring fluorescence (506 nm excitation/ 750 nm emission). The OMV concentration of the  
504 wild type sample was adjusted to match the concentration of the sample. Final OMV stocks were  
505 approximately 5000-fold concentrated compared to culture supernatant, and diluted 1:200 (based  
506 on the volume of the agar pad) into each sample of TIB-67 monocytes.

## 507 Acknowledgments

508 We wish to thank members of the Gitai and Shaevitz labs for helpful discussions and comments on  
509 the manuscript, the Bassler and O'Toole labs for strains and reagents, and Ben Bratton for technical  
510 assistance and data analysis. ZG is supported by an NIH Pioneer Award DP1-AI124669 and an award  
511 from the Princeton Catalysis Initiative.

## 512 Competing Interests

513 The authors declare no competing interests.

## 514 References

- 515 **Abdalla MY**, Hoke T, Seravalli J, Switzer BL, Bavitz M, Fliege JD, Murphy PJ, Britigan BE. *Pseudomonas* quinolone  
516 signal induces oxidative stress and inhibits heme oxygenase-1 expression in lung epithelial cells. *Infection*  
517 and immunity. 2017; 85(9):176. Pmid:28630072.
- 518 **Barr HL**, Halliday N, Cámara M, Barrett DA, Williams P, Forrester DL, Simms R, Smyth AR, Honeybourne D,  
519 Whitehouse JL. *Pseudomonas aeruginosa* quorum sensing molecules correlate with clinical status in cystic  
520 fibrosis. *European Respiratory Journal*. 2015; 46(4):1046–1054. Pmid:26022946.
- 521 **Bauman SJ**, Kuehn MJ. Purification of outer membrane vesicles from *Pseudomonas aeruginosa* and their  
522 activation of an IL-8 response. *Microbes and Infection*. 2006; 8(9-10):2400–2408.
- 523 **Belete B**, Lu H, Wozniak DJ. *Pseudomonas aeruginosa* AlgR regulates type IV pilus biosynthesis by activating tran-  
524 scription of the *fimU-pilVWXYZ1Y2E* operon. *Journal of Bacteriology*. 2008; 190(6):2023–2030. Pmid:18178737.
- 525 **Bohn YT**, Brandes G, Rakhimova E, Horatzek S, Salunkhe P, Munder A, Barneveld AV, Jordan D, Bredenbruch F,  
526 Häußler S. Multiple roles of *Pseudomonas aeruginosa* TBCF10839 PilY1 in motility, transport and infection.  
527 *Molecular microbiology*. 2009; 71(3):730–747.
- 528 **Bomberger JM**, MacEachran DP, Coutermarsh BA, Ye S, O'Toole GA, Stanton BA. Long-distance delivery of  
529 bacterial virulence factors by *Pseudomonas aeruginosa* outer membrane vesicles. *PLoS pathogens*. 2009;  
530 5(4):e1000382.
- 531 **Choi KH**, Schweizer HP. mini-Tn7 insertion in bacteria with single attTn7 sites: example *Pseudomonas aeruginosa*.  
532 *Nature protocols*. 2006; 1(1):153.
- 533 **Coleman JP**, Hudson LL, McKnight SL, Farrow JM, Calfee MW, Lindsey CA, Pesci EC. *Pseudomonas aeruginosa*  
534 PqsA is an anthranilate-coenzyme A ligase. *Journal of Bacteriology*. 2008; 190(4):1247–1255. Pmid:18083812.
- 535 **Collier DN**, Anderson L, McKnight SL, Noah TL, Knowles M, Boucher R, Schwab U, Gilligan P, Pesci EC. A bacterial  
536 cell to cell signal in the lungs of cystic fibrosis patients. *FEMS microbiology letters*. 2002; 215(1):41–46.
- 537 **Diggle SP**, Matthijs S, Wright VJ, Fletcher MP, Chhabra SR, Lamont IL, Kong X, Hider RC, Cornelis P, Cámara M. The  
538 *Pseudomonas aeruginosa* 4-quinolone signal molecules HHQ and PQS play multifunctional roles in quorum  
539 sensing and iron entrapment. *Chemistry biology*. 2007; 14(1):87–96.
- 540 **Farrow JM**, Sund ZM, Ellison ML, Wade DS, Coleman JP, Pesci EC. PqsE functions independently of PqsR-  
541 *Pseudomonas* quinolone signal and enhances the *rhl* quorum-sensing system. *Journal of Bacteriology*. 2008;  
542 190(21):7043–7051. Pmid:18776012.
- 543 **Fey P**, Kowal AS, Gaudet P, Pilcher KE, Chisholm RL. Protocols for growth and development of *Dictyostelium*  
544 *discoideum*. *Nature protocols*. 2007; 2(6):1307.
- 545 **Hassett DJ**, Sutton MD, Schurr MJ, Herr AB, Caldwell CC, Matu JO. *Pseudomonas aeruginosa* hypoxic or anaerobic  
546 biofilm infections within cystic fibrosis airways. *Trends in microbiology*. 2009; 17(3):130–138.

- 547 **Hazan R**, Que YA, Maura D, Strobel B, Majcherczyk PA, Hopper LR, Wilbur DJ, Hreha TN, Barquera B, Rahme LG.  
548 Auto poisoning of the respiratory chain by a quorum-sensing-regulated molecule favors biofilm formation  
549 and antibiotic tolerance. *Current Biology*. 2016; 26(2):195–206.
- 550 **Hmelo LR**, Borlee BR, Almblad H, Love ME, Randall TE, Tseng BS, Lin C, Irie Y, Storek KM, Yang JJ. Precision-  
551 engineering the *Pseudomonas aeruginosa* genome with two-step allelic exchange. *Nature protocols*. 2015;  
552 10(11):1820.
- 553 **Hoang TT**, Karkhoff-Schweizer RR, Kutchma AJ, Schweizer HP. A broad-host-range Flp-FRT recombination system  
554 for site-specific excision of chromosomally-located DNA sequences: application for isolation of unmarked  
555 *Pseudomonas aeruginosa* mutants. *Gene*. 1998; 212(1):77–86.
- 556 **Hoang TT**, Kutchma AJ, Becher A, Schweizer HP. Integration-proficient plasmids for *Pseudomonas aeruginosa*:  
557 site-specific integration and use for engineering of reporter and expression strains. *Plasmid*. 2000; 43(1):59–  
558 72.
- 559 **Kamath KS**, Krisp C, Chick J, Pascovici D, Gygi SP, Molloy MP. *Pseudomonas aeruginosa* proteome under hypoxic  
560 stress conditions mimicking the cystic fibrosis lung. *Journal of proteome research*. 2017; 16(10):3917–3928.
- 561 **Kim K**, Kim YU, Koh BH, Hwang SS, Kim S, Lépine F, Cho Y, Lee GR. HHQ and PQS, two *Pseudomonas aeruginosa*  
562 quorum-sensing molecules, down-regulate the innate immune responses through the nuclear factor- $\kappa$ B  
563 pathway. *Immunology*. 2010; 129(4):578–588.
- 564 **Kovach ME**, Elzer PH, Hill DS, Robertson GT, Farris MA, II RMR, Peterson KM. Four new derivatives of the  
565 broad-host-range cloning vector pBBR1MCS, carrying different antibiotic-resistance cassettes. *Gene*. 1995;  
566 166(1):175–176.
- 567 **Kuchma SL**, Delalez NJ, Filkins LM, Snavelly EA, Armitage JP, O'Toole GA. Cyclic di-GMP-mediated repression of  
568 swarming motility by *Pseudomonas aeruginosa* PA14 requires the MotAB stator. *Journal of Bacteriology*. 2015;  
569 197(3):420–430. Pmid:25349157.
- 570 **Laventie BJ**, Sangermani M, Estermann F, Manfredi P, Planes R, Hug I, Jaeger T, Meunier E, Broz P, Jenal U. A  
571 surface-induced asymmetric program promotes tissue colonization by *Pseudomonas aeruginosa*. *Cell host*  
572 *microbe*. 2019; 25(1):14–152. e6.
- 573 **Lee J**, Zhang L. The hierarchy quorum sensing network in *Pseudomonas aeruginosa*. *Protein cell*. 2015; 6(1):26–41.
- 574 **Lesic B**, Rahme LG. Use of the lambda Red recombinase system to rapidly generate mutants in *Pseudomonas*  
575 *aeruginosa*. *BMC molecular biology*. 2008; 9(1):20.
- 576 **Liberati NT**, Urbach JM, Miyata S, Lee DG, Drenkard E, Wu G, Villanueva J, Wei T, Ausubel FM. An ordered,  
577 nonredundant library of *Pseudomonas aeruginosa* strain PA14 transposon insertion mutants. *Proceedings of*  
578 *the National Academy of Sciences*. 2006; 103(8):2833–2838. Pmid:16477005.
- 579 **Lin J**, Cheng J, Wang Y, Shen X. The *Pseudomonas* Quinolone Signal (PQS): Not Just for Quorum Sensing Anymore.  
580 *Frontiers in cellular and infection microbiology*. 2018; 8:230.
- 581 **Loomis WF**. Sensitivity of *Dictyostelium discoideum* to nucleic acid analogues. *Experimental cell research*. 1971;  
582 64(2):484–486.
- 583 **Luo Y**, Zhao K, Baker AE, Kuchma SL, Coggan KA, Wolfgang MC, Wong GC, O'Toole GA. A hierarchical cas-  
584 cade of second messengers regulates *Pseudomonas aeruginosa* surface behaviors. *MBio*. 2015; 6(1):2456.  
585 Pmid:25626906.
- 586 **Marko VA**, Kilmury SL, MacNeil LT, Burrows LL. *Pseudomonas aeruginosa* type IV minor pilins and PilY1 regulate  
587 virulence by modulating FimS-AlgR activity. *PLoS pathogens*. 2018; 14(5):e1007074.
- 588 **Mashburn-Warren L**, Howe J, Brandenburg K, Whiteley M. Structural requirements of the *Pseudomonas*  
589 quinolone signal for membrane vesicle stimulation. *Journal of Bacteriology*. 2009; 191(10):3411–3414.  
590 Pmid:19286801.
- 591 **Maura D**, Hazan R, Kitao T, Ballok AE, Rahme LG. Evidence for direct control of virulence and defense gene  
592 circuits by the *Pseudomonas aeruginosa* quorum sensing regulator, MvfR. *Scientific reports*. 2016; 6:34083.
- 593 **Merritt JH**, Ha DG, Cowles KN, Lu W, Morales DK, Rabinowitz J, Gitai Z, O'Toole GA. Specific control of *Pseu-*  
594 *domonas aeruginosa* surface-associated behaviors by two c-di-GMP diguanylate cyclases. *MBio*. 2010; 1(4):183.  
595 Pmid:20978535.



- 596 **Nixon GM**, Armstrong DS, Carzino R, Carlin JB, Olinsky A, Robertson CF, Grimwood K. Clinical outcome after  
597 early *Pseudomonas aeruginosa* infection in cystic fibrosis. *The Journal of pediatrics*. 2001; 138(5):699–704.
- 598 **OLoughlin CT**, Miller LC, Siryaporn A, Drescher K, Semmelhack MF, Bassler BL. A quorum-sensing inhibitor  
599 blocks *Pseudomonas aeruginosa* virulence and biofilm formation. *Proceedings of the National Academy of*  
600 *Sciences*. 2013; 110(44):17981–17986. Pmid:24143808.
- 601 **Persat A**, Inclan YF, Engel JN, Stone HA, Gitai Z. Type IV pili mechanochemically regulate virulence factors in  
602 *Pseudomonas aeruginosa*. *Proceedings of the National Academy of Sciences*. 2015; p. 201502025.
- 603 **Rahme LG**, Stevens EJ, Wolfort SF, Shao J, Tompkins RG, Ausubel FM. Common virulence factors for bacterial  
604 pathogenicity in plants and animals. *Science*. 1995; 268(5219):1899–1902. Pmid:7604262.
- 605 **Rampioni G**, Falcone M, Heeb S, Frangipani E, Fletcher MP, Dubern JF, Visca P, Leoni L, Cámara M, Williams P.  
606 Unravelling the genome-wide contributions of specific 2-alkyl-4-quinolones and PqsE to quorum sensing in  
607 *Pseudomonas aeruginosa*. *PLoS pathogens*. 2016; 12(11):e1006029.
- 608 **Reil E**, Höfle G, Draber W, Oettmeier W. Quinolones and their N-oxides as inhibitors of mitochondrial complexes  
609 I and III. *Biochimica et Biophysica Acta (BBA)-Bioenergetics*. 1997; 1318(1-2):291–298.
- 610 **Richards MJ**, Edwards JR, Culver DH, Gaynes RP. Nosocomial infections in medical intensive care units in the  
611 United States. *Critical Care Medicine*. 1999; 27(5):887–892.
- 612 **Schertzer JW**, Brown SA, Whiteley M. Oxygen levels rapidly modulate *Pseudomonas aeruginosa* social behaviours  
613 via substrate limitation of PqsH. *Molecular microbiology*. 2010; 77(6):1527–1538.
- 614 **Siryaporn A**, Kim MK, Shen Y, Stone HA, Gitai Z. Colonization, competition, and dispersal of pathogens in fluid  
615 flow networks. *Current Biology*. 2015; 25(9):1201–1207.
- 616 **Siryaporn A**, Kuchma SL, O'Toole GA, Gitai Z. Surface attachment induces *Pseudomonas aeruginosa* virulence.  
617 *Proceedings of the National Academy of Sciences*. 2014; 111(47):16860–16865. Pmid:25385640.
- 618 **Streeter K**, Katouli M. *Pseudomonas aeruginosa*: A review of their Pathogenesis and Prevalence in Clinical  
619 Settings and the Environment. *Infection, Epidemiology and Microbiology*. 2016; 2(1):25–32.
- 620 **Thierbach S**, Birmes FS, Letzel MC, Hennecke U, Fetzner S. Chemical modification and detoxification of the  
621 *Pseudomonas aeruginosa* toxin 2-heptyl-4-hydroxyquinoline n-oxide by environmental and pathogenic bacteria.  
622 *ACS chemical biology*. 2017; 12(9):2305–2312.
- 623 **Valentini M**, Gonzalez D, Mavridou DA, Filloux A. Lifestyle transitions and adaptive pathogenesis of *Pseudomonas*  
624 *aeruginosa*. *Current opinion in microbiology*. 2018; 41:15–20.
- 625 **Wu Y**, Seyedsayamdost MR. Synergy and target promiscuity drive structural divergence in bacterial  
626 alkylquinolone biosynthesis. *Cell chemical biology*. 2017; 24(12):143–1444. e3.
- 627 **Xiao G**, Déziel E, He J, Lépine F, Lesic B, Castonguay M, Milot S, Tampakaki AP, Stachel SE, Rahme LG. MvfR,  
628 a key *Pseudomonas aeruginosa* pathogenicity LTTR-class regulatory protein, has dual ligands. *Molecular*  
629 *microbiology*. 2006; 62(6):1689–1699.
- 630 **Xiao G**, He J, Rahme LG. Mutation analysis of the *Pseudomonas aeruginosa mvfR* and *pqsABCDE* gene promoters  
631 demonstrates complex quorum-sensing circuitry. *Microbiology*. 2006; 152(6):1679–1686.

**Table 1.** Bacterial strains and cell lines used in this study.

| Parent Strain             | Strain                       | Relevant Characteristics                                                                    | Source                                      |
|---------------------------|------------------------------|---------------------------------------------------------------------------------------------|---------------------------------------------|
| <i>P. aeruginosa</i> PA14 | Wild type                    | -                                                                                           | <b>Rahme et al. (1995)</b>                  |
|                           | <i>lasR</i>                  | $\Delta lasR$                                                                               | <b>OLoughlin et al. (2013)</b>              |
|                           | <i>pilY1</i>                 | $\Delta pilY1$                                                                              | <b>Kuchma et al. (2015)</b>                 |
|                           | <i>pqsA</i>                  | $\Delta pqsA$                                                                               | This study                                  |
|                           | <i>pqsE</i>                  | $\Delta pqsE$                                                                               | This study                                  |
|                           | <i>pqsH</i>                  | $\Delta pqsH$                                                                               | This study                                  |
|                           | <i>pqsR</i>                  | $\Delta pqsR$                                                                               | This study                                  |
|                           | <i>pqsL</i>                  | <i>pqsL::Mar2xT7</i>                                                                        | <b>Liberati et al. (2006)</b>               |
|                           | <i>algR</i>                  | $\Delta algR$                                                                               | This study                                  |
|                           | <i>algR pilY1</i>            | $\Delta algR \Delta pilY1$                                                                  | This study                                  |
|                           | <i>phz</i>                   | $\Delta phzABCDEF G1 \Delta phzABCDEF G2$                                                   | This study                                  |
|                           | <i>rhIB</i>                  | <i>rhIB::Mar2xT7</i>                                                                        | <b>Liberati et al. (2006)</b>               |
|                           | <i>hcnB</i>                  | <i>hcnB::Mar2xT7</i>                                                                        | <b>Liberati et al. (2006)</b>               |
|                           | <i>rsmA</i>                  | $\Delta rsmA$                                                                               | This study                                  |
|                           | <i>gacA</i>                  | $\Delta gacA$                                                                               | This study                                  |
|                           | <i>vfr sadC</i>              | $\Delta vfr \Delta sadC$                                                                    | <b>Merritt et al. (2010)</b> and this study |
|                           | <i>pvdS fpvI</i>             | $\Delta pvdS \Delta fpvI$                                                                   | This study                                  |
|                           | $P_{const} - pqsA-E$         | $P_{OXB20}$                                                                                 | This study                                  |
|                           | $P_{const} - pqsA-E pqsR$    | $P_{OXB20}::pqsA \Delta pqsR$                                                               | This study                                  |
|                           | $P_{const} - pqsA-E pqsH$    | $P_{OXB20}::pqsA \Delta pqsH$                                                               | This study                                  |
|                           | $P_{const} - pqsA-E pqsHER$  | $P_{OXB20}::pqsA \Delta pqsH \Delta pqsE \Delta pqsR$                                       | This study                                  |
|                           | $P_{const} - pqsA-E pqsHERA$ | $P_{OXB20}::pqsA \Delta pqsH \Delta pqsE \Delta pqsR pqsA::Mar2xT7$                         | This study                                  |
|                           | $P_{const} - pqsA-E lasR$    | $P_{OXB20}::pqsA \Delta lasR$                                                               | This study                                  |
|                           | $P_{const} - pqsA-E pilY1$   | $P_{OXB20}::pqsA \Delta pilY1$                                                              | This study                                  |
|                           | $P_{pqsA} - mCherry$         | <i>attB::P<sub>pqsA</sub> - mCherry</i>                                                     | This study                                  |
|                           | $P_{pqsA} - mCherry pilY1$   | <i>attB::P<sub>pqsA</sub> - mCherry <math>\Delta pilY1</math></i>                           | This study                                  |
|                           | $P_{pqsA} - mCherry lasR$    | <i>attB::P<sub>pqsA</sub> - mCherry <math>\Delta lasR</math></i>                            | This study                                  |
|                           | $P_{lac} - vector$           | pBBRMCS3                                                                                    | <b>Kovach et al. (1995)</b> and this study  |
|                           | $P_{lac} - algRD54E$         | pBBRMCS3:: $P_{lac} - algRD54E$                                                             | This study                                  |
| <i>P. aeruginosa</i> PAO1 | AQ Biosensor                 | $\Delta pqsA \Delta pqsR glmS::P_{tac} - pqsR$<br>$pUCP18::P_{rpoD} - mKate P_{pqsA} - YFP$ | This study                                  |
|                           |                              |                                                                                             |                                             |
| <i>E. coli</i> B/r        | Wild type                    | -                                                                                           | <b>Siryaporn et al. (2015)</b>              |
| <i>D. discoïdium</i>      | AX3                          | -                                                                                           | <b>Loomis (1971)</b>                        |
| <i>M. musculus</i>        | J774A.1(ATCC® TIB-67™)       | -                                                                                           | ATCC                                        |
| <i>H. sapiens</i>         | A549 (ATCC® CCL-185™)        | -                                                                                           | ATCC                                        |

**Table 2.** Plasmids used in this study.

| Parent Strain | Plasmid                                      | Source                           |
|---------------|----------------------------------------------|----------------------------------|
| E. coli S17   | pEXG2                                        | <i>Hmelo et al. (2015)</i>       |
|               | mini-CTX-2                                   | <i>Hoang et al. (2000)</i>       |
|               | pUC18-mini-Tn7T-Gm                           | <i>Choi and Schweizer (2006)</i> |
|               | pUC18-mini-Tn7T-LAC                          | <i>Choi and Schweizer (2006)</i> |
|               | pUCP18-RedS                                  | <i>Lesic and Rahme (2008)</i>    |
|               | pFLP2                                        | <i>Hoang et al. (1998)</i>       |
|               | pUCP18:: $P_{rpoD}$ – mKate $P_{Paqa}$ – YFP | <i>Persat et al. (2015)</i>      |
|               | mini-CTX-2:: $P_{tac}$ – mCherry             | <i>Siryaporn et al. (2015)</i>   |
|               | pBBRMCS3                                     | <i>Kovach et al. (1995)</i>      |
|               | pSF-OXB20                                    | Oxford Genetics                  |
|               | pUC19                                        | New England Biolabs              |

**Table 3.** Primers used in this study.

| Primer       | Sequence                                                          |
|--------------|-------------------------------------------------------------------|
| pqsUP-5      | GAT ACA AAG CTT TCC AAC CGC CCG TAC TGC                           |
| pqsUP-3      | GCA CAC GGC GTT TCT ACA TAG CTG CCA TTT GCA GGC CTC C             |
| pqsDOWN-5    | GGA GGC CTG CAA ATG GCA GCT ATG TAG AAA CGC CGT GTG C             |
| pqsDOWN-3    | CGT TCC CTC TTC AGC GAT ATG GGG TGT GTC GAG TGG ATG G             |
| OXB20-5      | CCA TCC ACT CGA CAC ACC CCA TAT CGC TGA AGA GGG AAC G             |
| OXB20-3      | GAT ACA AAG CTT CCA GCG AGA AAT CGT CGA GC                        |
| pqsA-PaQa-5  | GAT ACC CTC GAG GTG GGT GTG CCA AAT TTC TCG                       |
| pqsA-PaQa-3  | GAT ACA GGA TCC CAG CGA TAT GCA TCC GGA TCA G                     |
| pqsR-5       | GAT ACC GCT AGC GAC CCG ATC AAG GGA AGC G                         |
| pqsR-3       | GAT ACC GCT AGC GCT CTA CTC TGG TGC GGC                           |
| pqsR-KO1     | GAT ACA AAG CTT CCT CAC CTC CAA AAC GAC G                         |
| pqsR-KO2     | GCG CCT TCG GGC CTG AGG CGG AGG AAA TCG AAC CGG                   |
| pqsR-KO3     | CCG GTT CGA TTT CCT CCG CCT CAG GCC CGA AGG CGC                   |
| pqsR-KO4     | GAT ACA AAG CTT GCT GGA ATT GCT CGC CTG G                         |
| algR-KO1     | GAT ACA AAG CTT ACC TGT CCG ACC TGT TCC G                         |
| algR-KO2     | GCA TCA GAC GCC TGA CCC CGC CAG AGG TTC GTC ATC GAC               |
| algR-KO3     | GTC GAT GAC GAA CCT CTG GCG GGG TCA GGC GTC TGA TGC               |
| algR-KO4     | GAT ACA AAG CTT GCT CGA GGC TGG CGT AGG                           |
| vfr-KO1      | GAT ACA AAG CTT TGG CGC GCC TTC TTC AGG                           |
| vfr-KO2      | GGT CTT TCC TTT CAC ATG CAC CAG GTG TTT GAG TTT GGG TGT GTG G     |
| vfr-KO3      | CCA CAC ACC CAA ACT CAA ACA CCT GGT GCA TGT GAA AGG AAA GAC C     |
| vfr-KO4      | GAT ACA AAG CTT CTG GAC GAC GTG CTG ATG G                         |
| gacA-KO1     | GAT ACC CTC GAG TGG AGC GTC TGG CTG AGG                           |
| gacA-KO2     | GCT CCA CGT CGC TGG TGA TGA TGT CGG CCA GCA TGC G                 |
| gacA-KO3     | CGC ATG CTG GCC GAC ATC ATC ACC AGC GAC GTG GAG C                 |
| gacA-KO4     | GAT ACC CTC GAG GCA GGT TGA GGC TCT CGC                           |
| rsmA-KO1     | GAT ACA AAG CTT CGA TTA CCT GAA CGC CCT GG                        |
| rsmA-KO2     | CCC GTT TGC AAA GGG AAA ATT AGA TTC CTT TCT CCT CAC GCG AAT ATT T |
| rsmA-KO3     | AAA TAT TCG CGT GAG GAG AAA GGA ATC TAA TTT TCC CTT TGC AAA CGG G |
| rsmA-KO4     | GAT ACA AAG CTT GCT TGT TTT ACC GTG AAA GAC CG                    |
| pvdS-KO1     | GAT ACA AAG CTT TTG TGC CCG GCG CTA TCG                           |
| pvdS-KO2     | GAA TGC TCG CCG CCG TCA CAG TTG TTC CGA CAT GGA AAT CAC           |
| pvdS-KO3     | GTG ATT TCC ATG TCG GAA CAA CTG TGA CGG CGG CGA GCA TTC           |
| pvdS-KO4     | GAT ACA AAG CTT GCC ATG CTT CCG TCC CC                            |
| fpvi-KO1     | GAT ACC CTC GAG GCA ACA TAA GCA GGG CGA GG                        |
| fpvi-KO2     | CGA ATA GCG AAA TCA GTC GGC ATA ATG GTT TTC CAA GAC GAC TCC       |
| fpvi-KO3     | GGA GTC GTC TTG GAA AAC CAT TAT GCC GAC TGA TTT CGC TAT TCG       |
| fpvi-KO4     | GAT ACC CTC GAG CGC AGG TAG TCG TTG AAC TCC                       |
| pqsA-KO1     | GAT ACA AAG CTT GCC TCG AAC TGT GAG ATC TGG                       |
| pqsA-KO2     | CGT GAT AAA GGG TGT CGG CCG GTC AGG TTG GCC AAT GTG G             |
| pqsA-KO3     | CCA CAT TGG CCA ACC TGA CCG GCC GAC ACC CTT TAT CAC G             |
| pqsA-KO4     | GAT ACA AAG CTT GAC CAG GAC GTT GCG ATA GC                        |
| pqsE-KO1     | GAT ACA AAG CTT CCT TCC TCG ATG AGA ACG TCC                       |
| pqsE-KO2     | GCT CCC CAG GTG CAG TTC GTC ATC ATC CAG TTG ACC GGG               |
| pqsE-KO3     | CCC GGT CAA CTG GAT GAT GAC GAA CTG CAC CTG GGG AGC               |
| pqsE-KO4     | GAT ACA AAG CTT CTC AAC GGT GCC AGC AAG G                         |
| pqsH-KO1     | GAT ACA AAG CTT AGC GGG GTC TGC GTA TAG C                         |
| pqsH-KO2     | TAC TGT GCG GCC ATC TCA CCC TGG ATA AGA ACG GTC ATC CG            |
| pqsH-KO3     | CGG ATG ACC GTT CTT ATC CAG GGT GAG ATG GCC GCA CAG TA            |
| pqsH-KO4     | GAT ACA AAG CTT CAG TCT TCA CCG CAG TCG G                         |
| algR-pUC19-5 | GAT ACA GGT ACC ATG AAT GTC CTG ATT GTC GAT GAC                   |
| algR-pUC19-3 | GAT ACC GAG CTC TCA GAG CTG ATG CAT CAG ACG                       |
| algR-D54E-Fw | CCC GAT ATC GTC CTG CTG GAA ATC CGC ATG CCC GGT CTG G             |

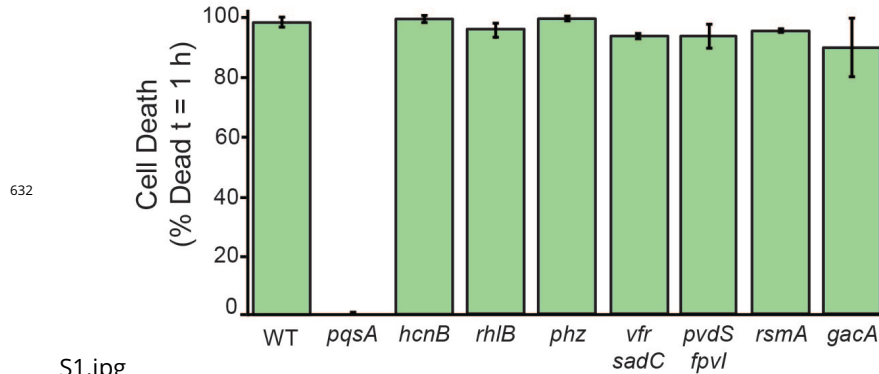

S1.jpg

**Figure 1-Figure supplement 1.** Quantification of *D. discoideum* killing by surface-attached *P. aeruginosa* mutants after 1 hour of co-culture. Cell death was indicated by positive staining by the fluorescent dye calcein-AM. Values are averages of three independent experiments and error bars represent standard error. Approximately 150-300 cells were analyzed for each measurement.

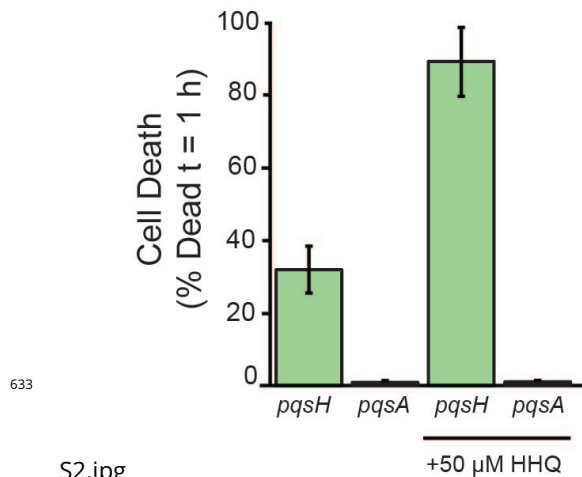

S2.jpg

**Figure 1-Figure supplement 2.** Quantification of *D. discoideum* killing by surface-attached *P. aeruginosa* *pqsH* and *pqsA* mutants supplemented with exogenous HHQ or PQS. HHQ, PQS, or DMSO was added to cultures after the initial 1:100 dilution, and then cultures were grown following the procedures for the *D. discoideum* cell death assay, as described in *Materials and Methods*. Surface attached and planktonic bacteria were washed twice in PSDB to remove any exogenous HHQ or PQS prior to incubating the bacteria with *D. discoideum*. Values are averages of three independent experiments and error bars represent standard error. Approximately 300-500 cells were analyzed for each measurement

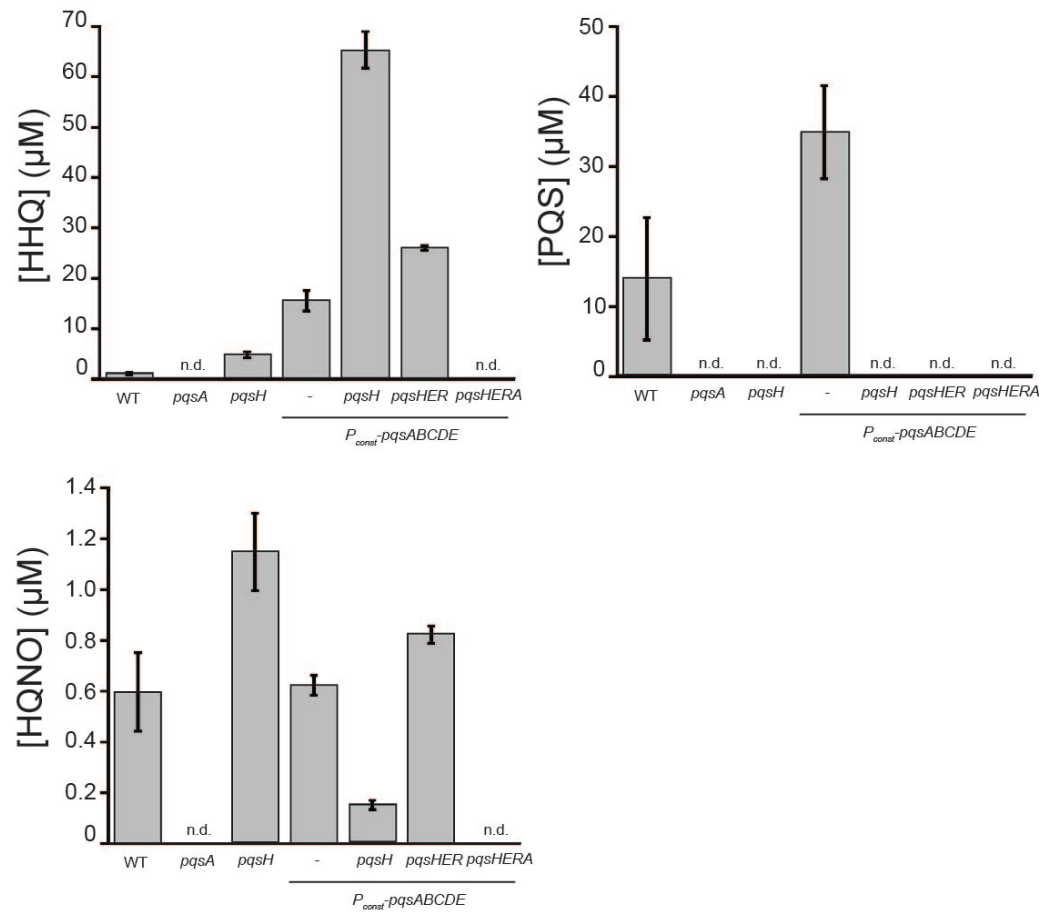

634

S3.jpg

**Figure 1-Figure supplement 3.** Quantification of alkyl-quinolone concentrations in wild type and mutant *P. aeruginosa* cultures using LC/MS. Stationary phase cultures were extracted with ethyl acetate, dried, and resuspended in methanol. Samples were analyzed by LC/MS, and AQ concentrations were calculated using a standard curve constructed from commercial AQ standards. Values are averages of three independent samples and error bars represent standard error (n.d.=not detected).

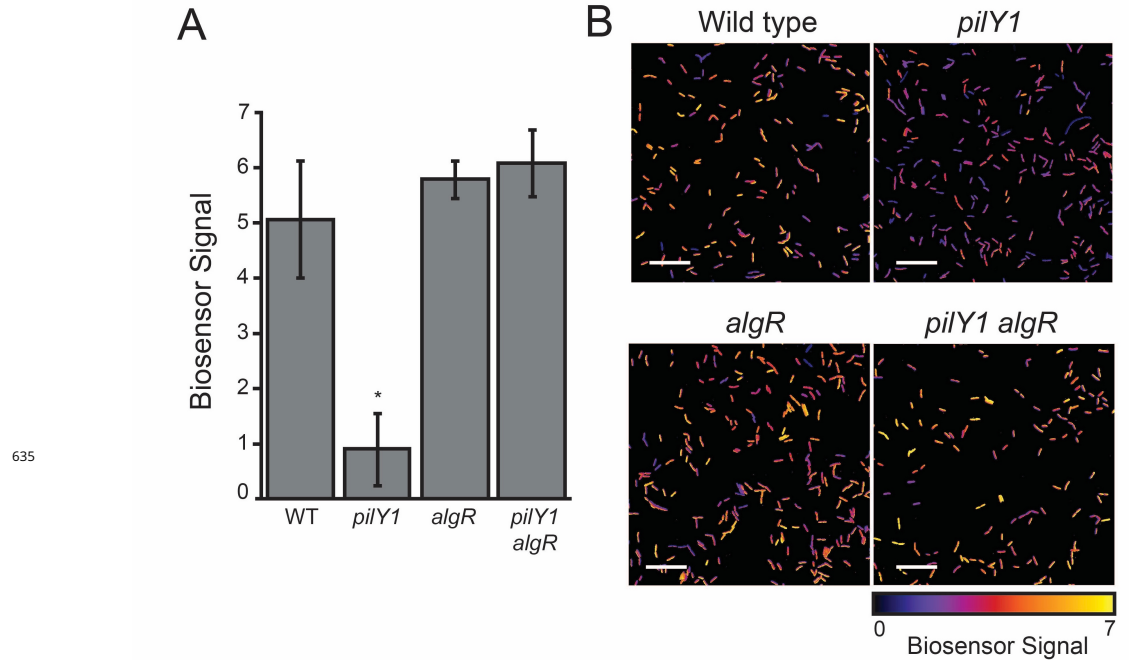

(1).jpg

**Figure 3-Figure supplement 1.** Biosensor-based quantification of AQ levels in surface-attached *P. aeruginosa* populations. AQ biosensor was doped into *P. aeruginosa* samples as described in Figure 3. Mean YFP/mKate fluorescence intensity per cell was calculated for approximately 500 cells, and values were normalized by the mean YFP/mKate fluorescence of biosensor doped into the surface-attached *pqsA* mutant. Values are averages of three independent experiments and error bars represent standard error. (B) Representative images of samples described in (A) (scale bars = 10  $\mu\text{m}$ ).

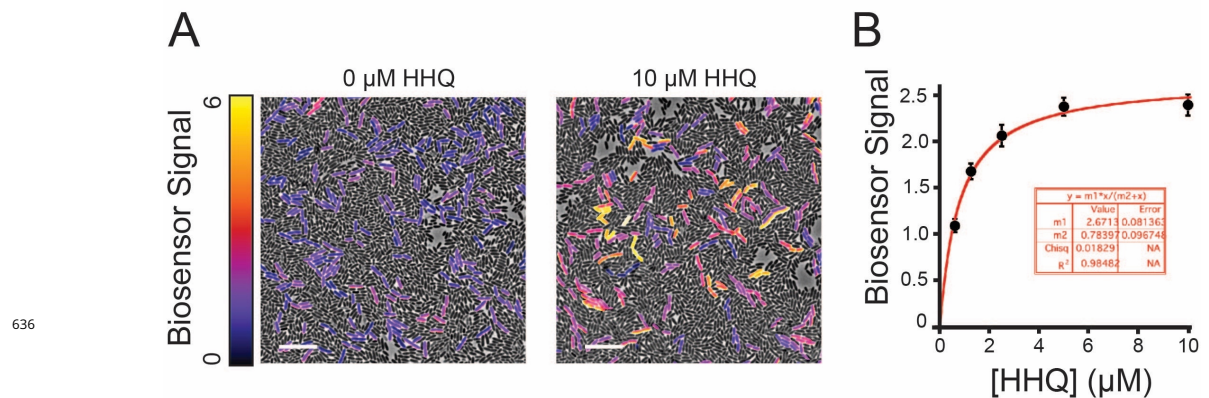

S5 (1).jpg

**Figure 3-Figure supplement 2.** (A) Representative images of AQ biosensor doped into samples of surface-attached  $\Delta pqsA$  *P. aeruginosa* treated with 10  $\mu\text{M}$  HHQ or DMSO added to 1% agar pads used for imaging (scale bars = 5  $\mu\text{m}$ ). (B) Mean biosensor signal per cell calculated from approximately 500 individual cells for each HHQ concentration. Standard curves were constructed for each independent experiment and used to calculate HHQ concentrations in Figure 3. Error bars represent standard error. Curve fit was computed using KaleidaGraph software (Synergy Software, Reading, PA).

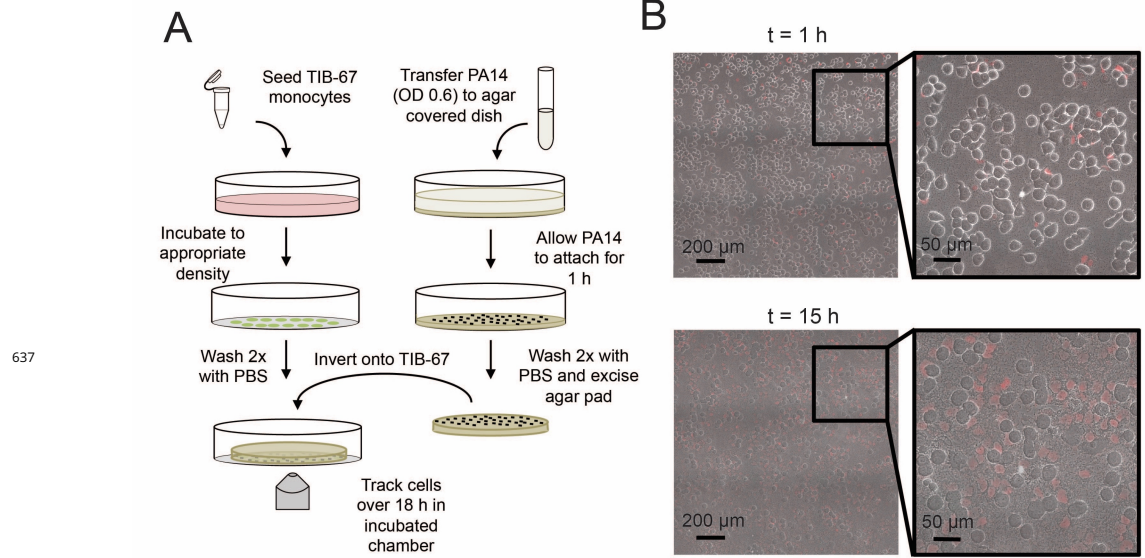

(1).jpg

**Figure 4–Figure supplement 1.** (A) Schematic of the monocyte cell death assay described in *Materials and Methods*. (B) Representative images of TIB-67 monocytes treated with surface-attached, wild type *P. aeruginosa* at a multiplicity of infection of approximately 1:50 at 1 and 15 hours of incubation at 30°C. Cell death is indicated by propidium iodide staining.
